# Supplementary material
Source: publisher figshare collection journal article supplement (https://acs.figshare.com/ndownloader/files/4485766)

# Supporting Information

## **Diastereo- and Enantioselective *anti*-Alkoxyallylation Employing Allylic *gem*-Dicarboxylates as Allyl Donors *via* Iridium Catalyzed Transfer Hydrogenation**

Soo Bong Han, Hoon Han and Michael J. Krische\*

*University of Texas at Austin, Department of Chemistry and Biochemistry,  
Austin, TX 78712, USA*

### Table of Contents

|                                                                                                  |        |
|--------------------------------------------------------------------------------------------------|--------|
| General Experimental Methods .....                                                               | S2     |
| Procedure for the Preparation of <i>BIPHEP-I</i> and ( <i>R</i> )- <i>SEGPHOS-I</i> .....        | S3     |
| Procedure and Spectral Data for Diastereo- and Enantioselective <i>anti</i> -Alkoxyallation ---- | S4–S52 |
| Assignment of Absolute Stereochemistry .....                                                     | S41    |

## **General Methods**

All reactions were run under an atmosphere of nitrogen. Tetrahydrofuran (THF) and toluene were obtained from Pure-Solv MD-5 Solvent Purification System (Innovative Technology). Anhydrous solvents were transferred by an oven-dried syringe. Sealed tubes (13x100 mm<sup>2</sup>) were purchased from Fischer Scientific and were dried in an oven overnight and cooled under a stream of nitrogen prior to use. Commercially available alcohols and aldehydes were purified by distillation or recrystallisation prior to use. Cesium carbonate was purchased from Alfa Aesar and was used directly without further purification. Isopropanol (Fisher) was purified by distillation prior to use. Analytical thin-layer chromatography (TLC) was carried out using 0.2-mm commercial silica gel plates (DC-Fertigplatten Kieselgel 60 F<sub>254</sub>). Infrared spectra were recorded on a Perkin-Elmer 1600 spectrometer. High-resolution mass spectra (HRMS) were obtained on a Karatos MS9 and are reported as m/z (relative intensity). Accurate masses are reported for the molecular ion (M+H, M or M-H) or a suitable fragment ion. Nuclear magnetic resonance spectra (<sup>1</sup>H NMR and <sup>13</sup>C NMR) spectra were recorded with a Varian Gemini (400 MHz) spectrometer for CDCl<sub>3</sub> solutions and chemical shifts are reported as parts per million (ppm) relative to residual CHCl<sub>3</sub> δ<sub>H</sub> (7.26 ppm) and CDCl<sub>3</sub> δ<sub>C</sub> (77.0 ppm), respectively, as internal standards. Coupling constants are reported in Hertz (Hz).

### **Preparation of BIPHEP-I**

To a mixture of  $[\text{Ir}(\text{cod})\text{Cl}]_2$  (87.3 mg, 0.13 mmol, 100 mol%), BIPHEP (136 mg, 0.26 mmol, 200 mol%),  $\text{Cs}_2\text{CO}_3$  (169 mg, 0.52 mmol, 400 mol%), 4-CN-3- $\text{NO}_2\text{BzOH}$  (100 mg, 0.52 mmol, 400 mol%) and allyl acetate (65 mg, 0.65 mmol, 500 mol%) in a sealed tube under  $\text{N}_2$  atmosphere was added THF (2.6 mL, 0.05 M). The reaction mixture was stirred for 30 min at ambient temperature and heated for 1.5 hr at 80 °C, at which point the reaction mixture was allowed to cool to ambient temperature. The reaction mixture was filtered and washed with THF (10 mL). The filtrate was concentrated *in vacuo* and hexanes (50 mL) was added. A yellow precipitate formed, which was collected by filtration and dried under vacuum (108 mg, 0.11 mmol, 88% yield).

### **Preparation of (R)-SEGPHOS-I**

To a mixture of  $[\text{Ir}(\text{cod})\text{Cl}]_2$  (87.3 mg, 0.13 mmol, 100 mol%), (R)-SEGPHOS (159 mg, 0.26 mmol, 200 mol%),  $\text{Cs}_2\text{CO}_3$  (169 mg, 0.52 mmol, 400 mol%), 4-CN-3- $\text{NO}_2\text{BzOH}$  (100 mg, 0.52 mmol, 400 mol%) and allyl acetate (65 mg, 0.65 mmol, 500 mol%) in a sealed tube under  $\text{N}_2$  atmosphere was added THF (2.6 mL, 0.05 M). The reaction mixture was stirred for 30 min at ambient temperature and heated for 1.5 hr at 80 °C, at which point the reaction mixture was allowed to cool to ambient temperature. The reaction mixture was filtered and washed with THF (10 mL). The filtrate was concentrated *in vacuo* and hexanes (50 mL) was added. A yellow precipitate formed, which was collected by filtration and dried under vacuum (101 mg, 0.098 mmol, 75% yield).

## **Detailed Procedure and Spectral Data for Diastereo- and Enantioselective anti-Alkoxyallylation**

### **1-(4-(methoxycarbonyl)phenyl)but-3-ene-1,2-diyl diacetate**

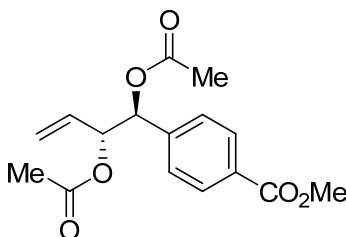

**3c (a)**

An oven-dried sealed tube under one atmosphere of nitrogen gas was charged with *BIPHEP-I* (9.5 mg, 0.01 mmol, 5 mol%) and THF (1.0 M, 0.2 mL). Methyl 4-formylbenzoate **2c** (32.8 mg, 0.2 mmol, 100 mol%), acrolein *gem*-diacetate **1a**<sup>1</sup> (63 mg, 0.4 mmol, 200 mol%), anhydrous K<sub>3</sub>PO<sub>4</sub> (43 mg, 0.2 mmol, 100 mol%) and isopropanol (24 mg, 0.4 mmol, 200 mol%) were added and the reaction mixture was allowed to stir at 60 °C for 48 hr, at which point the reaction mixture was cooled to ambient temperature. Acetyl chloride (71 µL, 1.0 mmol, 500 mol%), Et<sub>3</sub>N (270 µL, 2.0 mmol, 1000 mol%), DMAP (1.2 mg, 0.01 mmol, 5 mol%) and CH<sub>2</sub>Cl<sub>2</sub> (0.6 mL) were added. The reaction mixture was allowed to stir at ambient temperature for 20 hr, at which point the reaction mixture was quenched with aqueous NH<sub>4</sub>Cl (3 mL) and extracted with CH<sub>2</sub>Cl<sub>2</sub>. The organic layer was dried (MgSO<sub>4</sub>), filtered and concentrated *in vacuo*. Purification of the residue by column chromatography (SiO<sub>2</sub>; ethyl acetate:hexanes, 1:7) provided **3c (a)** (45 mg, 0.148 mmol) as a colorless oil in 74% yield (4:1 dr).

**<sup>1</sup>H NMR** (400 MHz, CDCl<sub>3</sub>): δ 8.01 (d, *J* = 8.4 Hz, 2H), 7.41 (d, *J* = 8.4 Hz, 2H), 5.99 (d, *J* = 4.8 Hz, 1H), 5.79-5.70 (m, 1H), 5.55-5.53 (m, 1H), 5.26-5.18 (m, 2H), 3.91 (s, 3H), 2.14 (s, 3H), 2.02 (s, 3H).

**<sup>13</sup>C NMR** (100 MHz, CDCl<sub>3</sub>): δ 169.7, 166.7, 141.1, 131.1, 130.1, 129.7, 129.5, 127.2, 120.2, 75.6, 75.0, 52.2, 21.0, 20.9.

**FTIR** (neat): 1721, 1437, 1372, 1281, 1222, 1111, 1020, 988, 906, 816, 727 cm<sup>-1</sup>.

<sup>1</sup> Saini, A.; Kumar, S.; Sandhu, J. S. *Synth. Commun.* **2008**, 38, 106.

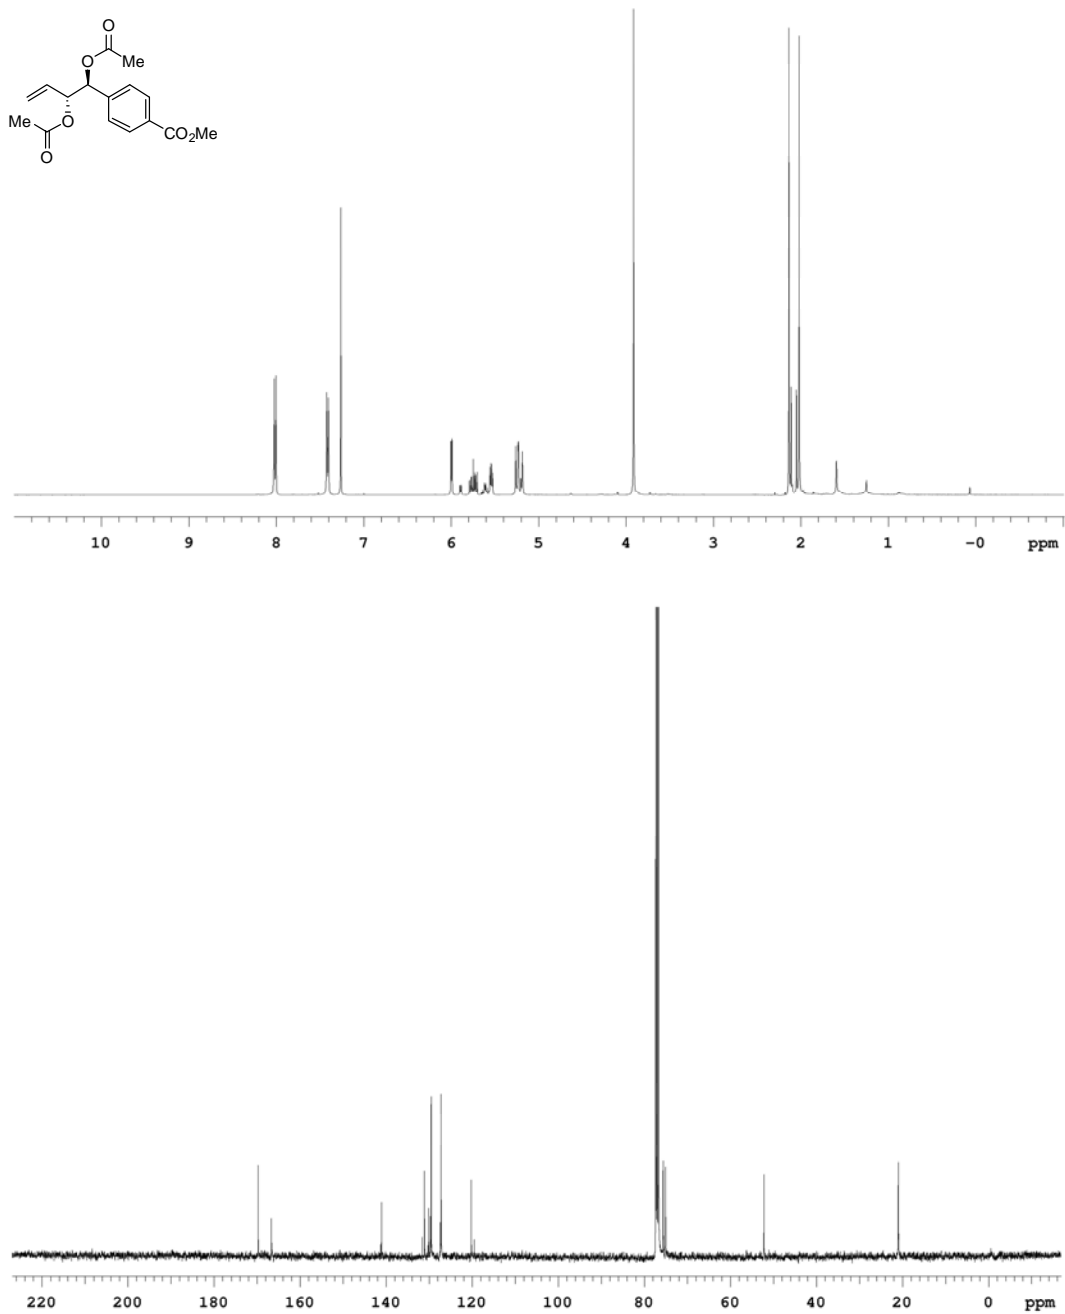

### 1-(4-(methoxycarbonyl)phenyl)but-3-ene-1,2-diyl dipropionate

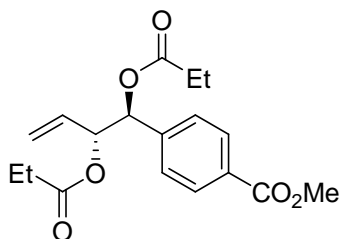

**3c (b)**

An oven-dried sealed tube under one atmosphere of nitrogen gas was charged with *BIPHEP-I* (9.5 mg, 0.01 mmol, 5 mol%) and THF (1.0 M, 0.2 mL). Methyl 4-formylbenzoate **2c** (32.8 mg, 0.2 mmol, 100 mol%), acrolein *gem*-dipropionate **1b**<sup>1</sup> (74 mg, 0.4 mmol, 200 mol%), anhydrous K<sub>3</sub>PO<sub>4</sub> (43 mg, 0.2 mmol, 100 mol%) and isopropanol (24 mg, 0.4 mmol, 200 mol%) were added and the reaction mixture was allowed to stir at 60 °C for 48 hr, at which point the reaction mixture was cooled to ambient temperature. Propionyl chloride (87 μL, 1.0 mmol, 500 mol%), Et<sub>3</sub>N (270 μL, 2.0 mmol, 1000 mol%), DMAP (1.2 mg, 0.01 mmol, 5 mol%) and CH<sub>2</sub>Cl<sub>2</sub> (0.6 mL) were added. The reaction mixture was allowed to stir at ambient temperature for 20 hr, at which point the reaction mixture was quenched with aqueous NH<sub>4</sub>Cl (3 mL) and extracted with CH<sub>2</sub>Cl<sub>2</sub>. The organic layer was dried (MgSO<sub>4</sub>), filtered and concentrated *in vacuo*. Purification of the residue by column chromatography (SiO<sub>2</sub>; ethyl acetate:hexanes, 1:9) provided **3c (b)** (43 mg, 0.13 mmol) as a colorless oil in 65% yield (5:1 dr).

**<sup>1</sup>H NMR** (400 MHz, CDCl<sub>3</sub>): δ 8.01 (d, *J* = 8.4 Hz, 2H), 7.42 (d, *J* = 8.4 Hz, 2H), 6.01 (d, *J* = 5.2 Hz, 1H), 5.79-5.71 (m, 1H), 5.58-5.55 (m, 1H), 5.26-5.19 (m, 2H), 3.91 (s, 3H), 2.41 (qd, *J* = 7.6, 2.8 Hz, 2H), 2.28 (qd, *J* = 7.6, 2.0 Hz, 2H), 1.16 (t, *J* = 7.6 Hz, 3H), 1.08 (t, *J* = 7.6 Hz, 3H).

**<sup>13</sup>C NMR** (100 MHz, CDCl<sub>3</sub>): δ 173.1 (two carbons are overlapped), 166.7, 141.3, 131.2, 130.0, 129.5, 127.2, 120.0, 75.4, 74.8, 52.2, 27.7, 27.6, 9.0, 8.9.

**FTIR** (neat): 1724, 1437, 1281, 1181, 1113, 1083, 1019, 905, 726 cm<sup>-1</sup>.

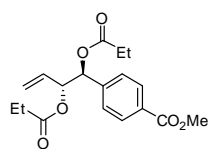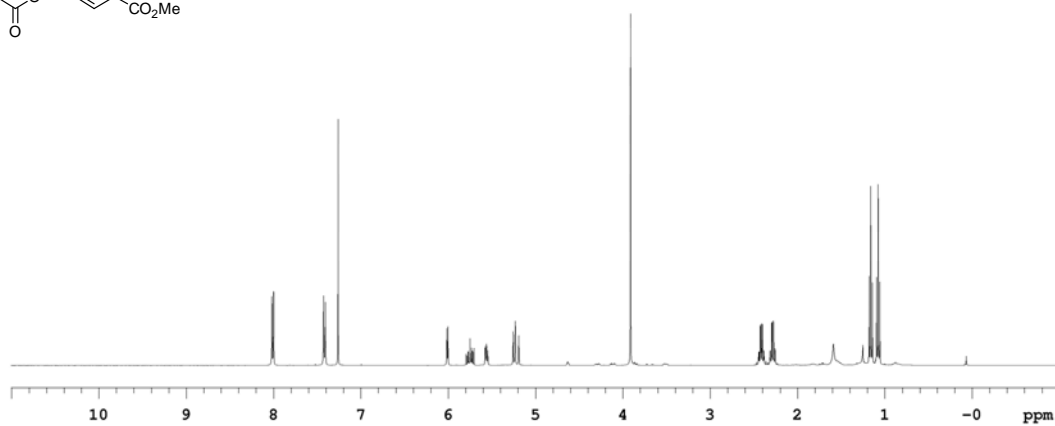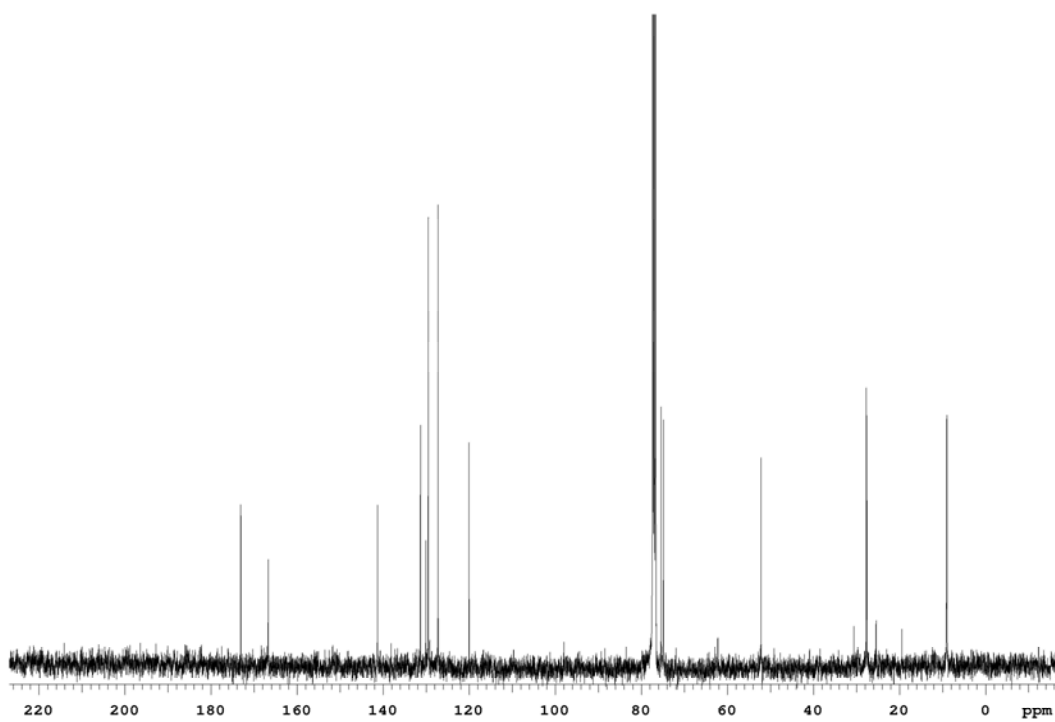

**1-(4-(methoxycarbonyl)phenyl)but-3-ene-1,2-diyl bis(2-methylpropanoate)**

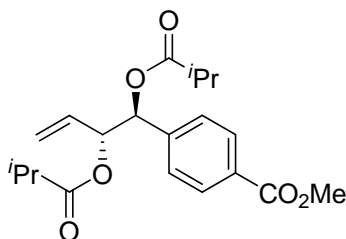

**3c (c)**

An oven-dried sealed tube under one atmosphere of nitrogen gas was charged with *BIPHEP-I* (9.5 mg, 0.01 mmol, 5 mol%) and THF (1.0 M, 0.2 mL). Methyl 4-formylbenzoate **2c** (32.8 mg, 0.2 mmol, 100 mol%), acrolein *gem*-diisobutyrate **1c**<sup>1</sup> (86 mg, 0.4 mmol, 200 mol%), anhydrous K<sub>3</sub>PO<sub>4</sub> (43 mg, 0.2 mmol, 100 mol%) and isopropanol (24 mg, 0.4 mmol, 200 mol%) were added and the reaction mixture was allowed to stir at 60 °C for 48 hr, at which point the reaction mixture was cooled to ambient temperature. Isobutyryl chloride (105 μL, 1.0 mmol, 500 mol%), Et<sub>3</sub>N (270 μL, 2.0 mmol, 1000 mol%), DMAP (1.2 mg, 0.01 mmol, 5 mol%) and CH<sub>2</sub>Cl<sub>2</sub> (0.6 mL) were added. The reaction mixture was allowed to stir at ambient temperature for 20 hr, at which point the reaction mixture was quenched with aqueous NH<sub>4</sub>Cl (3 mL) and extracted with CH<sub>2</sub>Cl<sub>2</sub>. The organic layer was dried (MgSO<sub>4</sub>), filtered and concentrated *in vacuo*. Purification of the residue by column chromatography (SiO<sub>2</sub>; ethyl acetate:hexanes, 1:15) provided **3c (c)** (23 mg, 0.064 mmol) as a colorless oil in 32% yield (8:1 dr).

**<sup>1</sup>H NMR** (400 MHz, CDCl<sub>3</sub>): δ 8.00 (d, *J* = 8.4 Hz, 2H), 7.42 (d, *J* = 8.4 Hz, 2H), 5.98 (d, *J* = 5.2 Hz, 1H), 5.79-5.70 (m, 1H), 5.56-5.53 (m, 1H), 5.25-5.19 (m, 2H), 3.90 (s, 3H), 2.65-2.45 (m, 2H), 1.20-1.16 (m, 6H), 1.10-1.15 (m, 6H).

**<sup>13</sup>C NMR** (100 MHz, CDCl<sub>3</sub>): δ 175.5, 175.4, 166.6, 141.4, 131.4, 130.0, 129.4, 127.2, 119.8, 75.2, 74.6, 52.1, 34.0 (two carbons overlap), 18.9, 18.8.

**FTIR** (neat): 1725, 1470, 1437, 1388, 1281, 1189, 1149, 1112, 1069, 1020, 989, 906, 854, 727 cm<sup>-1</sup>.



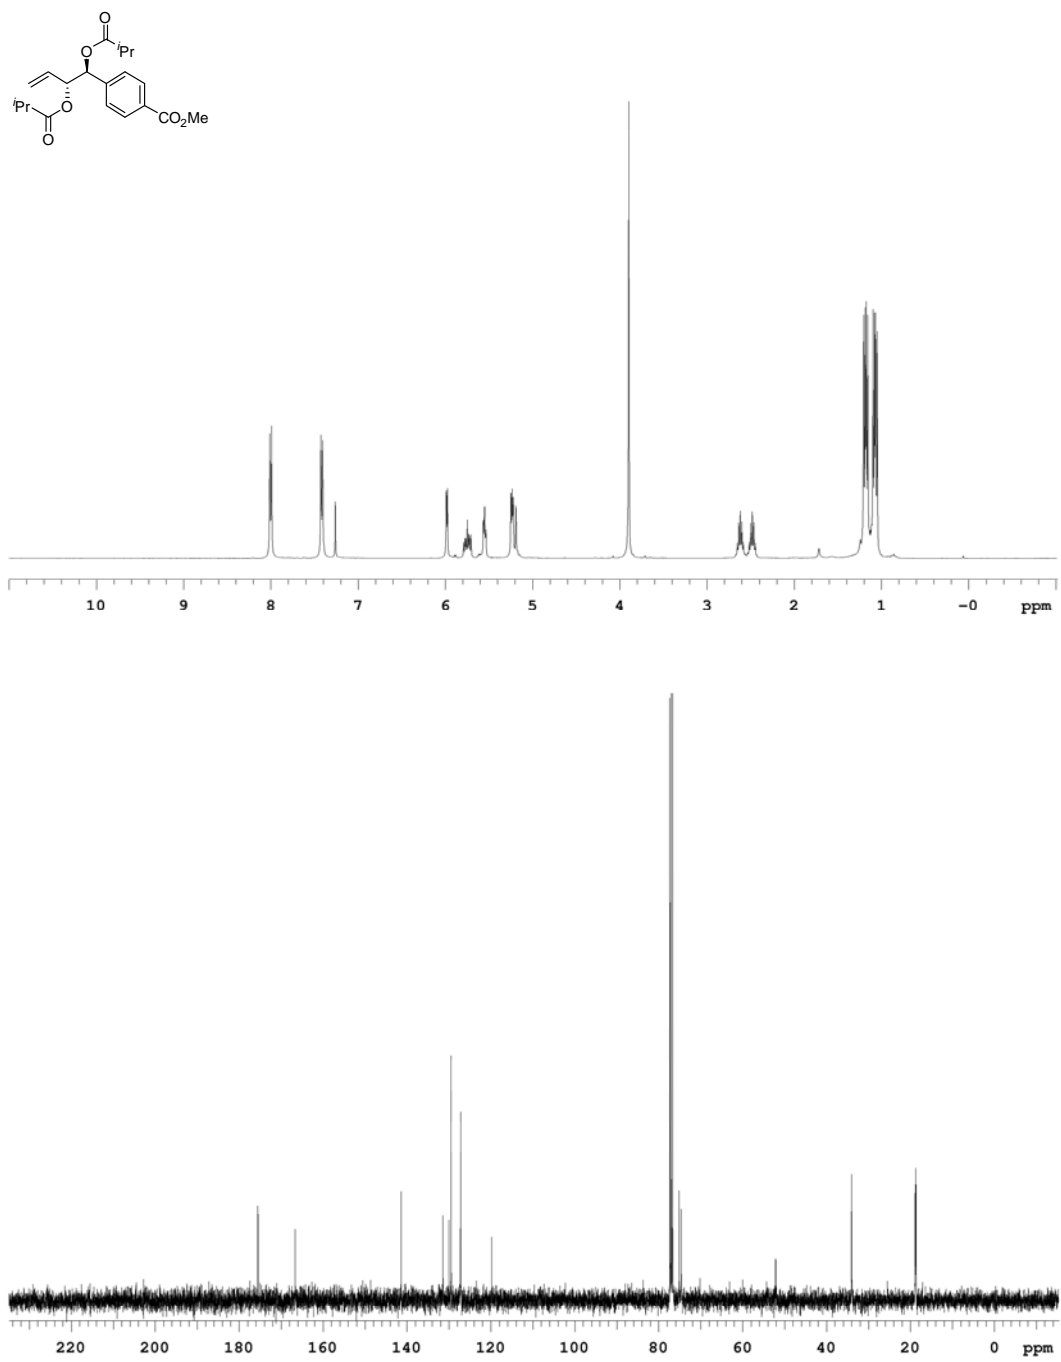

**1-(4-(methoxycarbonyl)phenyl)but-3-ene-1,2-diyl bis(2,2-dimethylpropanoate)**

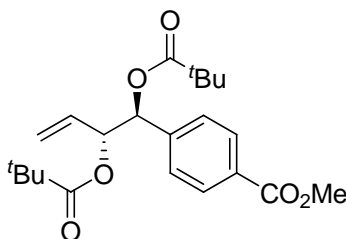

**3c (d)**

An oven-dried sealed tube under one atmosphere of nitrogen gas was charged with **BIPHEP-I** (9.5 mg, 0.01 mmol, 5 mol%) and THF (1.0 M, 0.2 mL). Methyl 4-formylbenzoate **2c** (32.8 mg, 0.2 mmol, 100 mol%), acrolein *gem*-dipivalate **1d**<sup>2</sup> (97 mg, 0.4 mmol, 200 mol%), anhydrous K<sub>3</sub>PO<sub>4</sub> (43 mg, 0.2 mmol, 100 mol%) and isopropanol (24 mg, 0.4 mmol, 200 mol%) were added and the reaction mixture was allowed to stir at 60 °C for 48 hr, at which point the reaction mixture was cooled to ambient temperature. Pivaloyl chloride (123  $\mu$ L, 1.0 mmol, 500 mol%), Et<sub>3</sub>N (270  $\mu$ L, 2.0 mmol, 1000 mol%), DMAP (1.2 mg, 0.01 mmol, 5 mol%) and CH<sub>2</sub>Cl<sub>2</sub> (0.6 mL) were added. The reaction mixture was allowed to stir at ambient temperature for 20 hr, at which point the reaction mixture was quenched with aqueous NH<sub>4</sub>Cl (3 mL) and extracted with CH<sub>2</sub>Cl<sub>2</sub>. The organic layer was dried (MgSO<sub>4</sub>), filtered and concentrated *in vacuo*. Purification of the residue by column chromatography (SiO<sub>2</sub>; ethyl acetate:hexanes, 1:20) provided **3c (d)** (12 mg, 0.003 mmol) as a colorless oil in 15% yield (10:1 dr).

**<sup>1</sup>H NMR** (400 MHz, CDCl<sub>3</sub>):  $\delta$  8.01 (d,  $J$  = 8.4 Hz, 2H), 7.42 (d,  $J$  = 8.4 Hz, 2H), 5.97 (d,  $J$  = 5.2 Hz, 1H), 5.79-5.71 (m, 1H), 5.55-5.52 (m, 1H), 5.26-5.19 (m, 2H), 3.91(s, 3H), 1.23 (s, 9H), 1.12 (s, 9H).

**<sup>13</sup>C NMR** (100 MHz, CDCl<sub>3</sub>):  $\delta$  177.0, 176.8, 166.7, 141.5, 131.4, 129.8, 129.5, 127.2, 119.6, 75.3, 74.8, 52.2, 38.9, 38.8, 27.1, 27.0.

**FTIR** (neat): 1725, 1479, 1437, 1397, 1279, 1140, 1020, 988, 907, 729 cm<sup>-1</sup>.

<sup>2</sup> Lombardo, M.; Licciulli, S.; Pasi, F.; Angelici, G.; Trombini, C. *Adv. Synth. Catal.* **2005**, *347*, 2015.

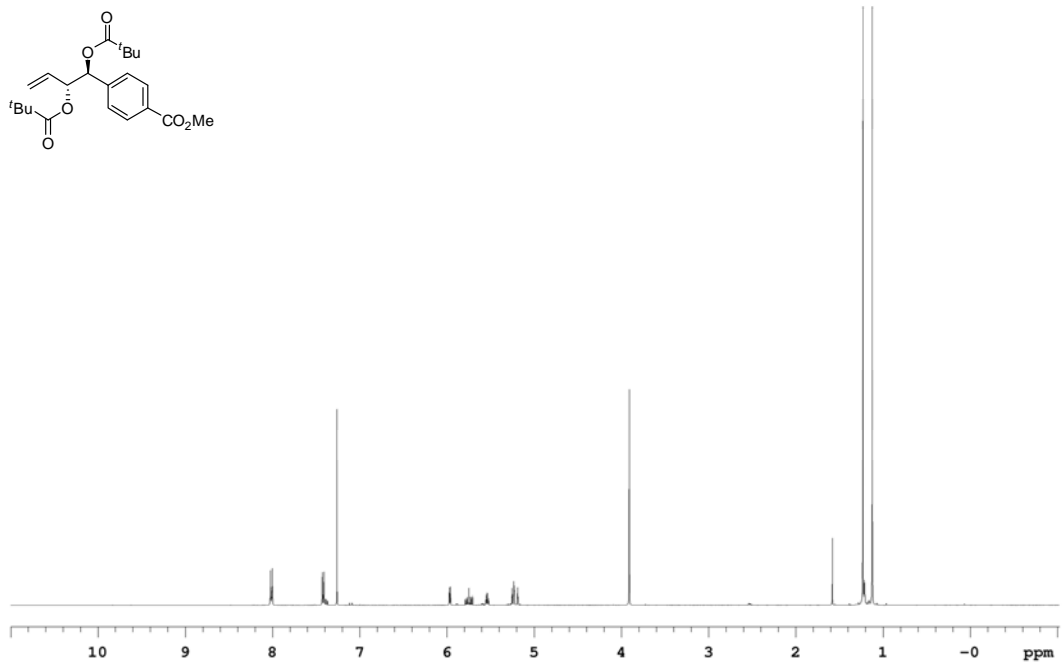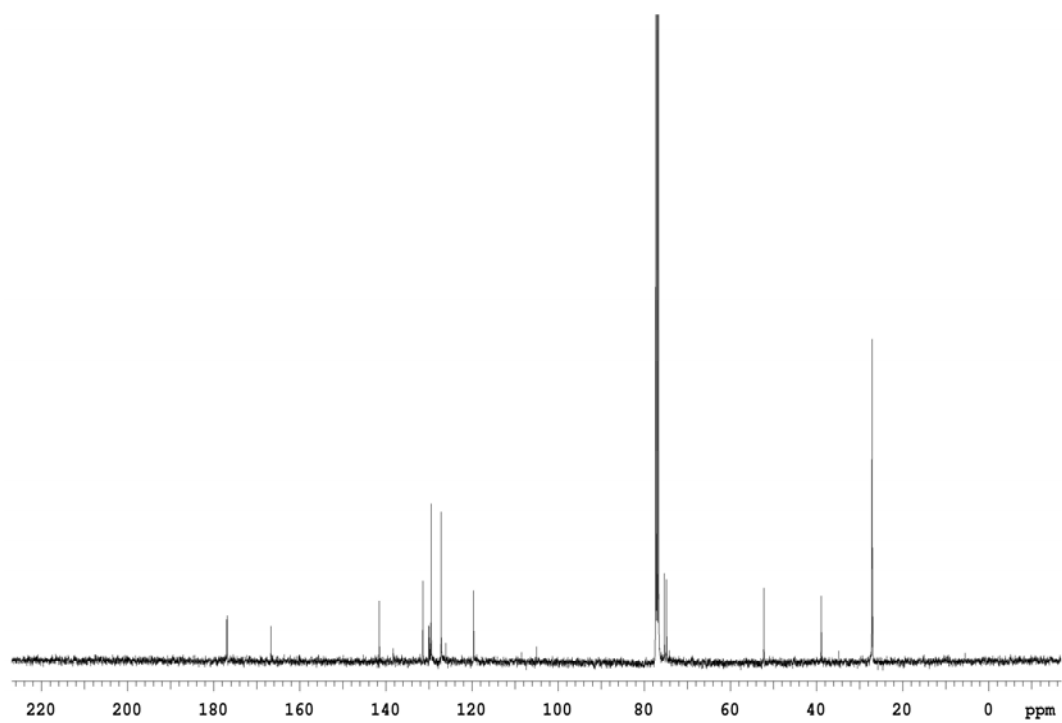

### Acrolein *gem*-dibenzoate

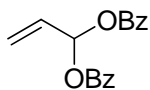

**1e**

In accordance with a modified literature procedure<sup>2</sup>, 3 drops of H<sub>2</sub>SO<sub>4</sub> were added to a solution of benzoic anhydride (22.6 g, 100 mmol, 100 mol%) in CH<sub>2</sub>Cl<sub>2</sub> (1.0 M, 100 mL). A solution of freshly distilled acrolein (10 mL, 150 mmol, 150 mol%) in CH<sub>2</sub>Cl<sub>2</sub> (10 mL) was added drop by drop, at a rate slow enough to maintain the solution at ambient temperature. The reaction mixture was stirred at ambient temperature for 72 hr and filtered through a short pad of K<sub>2</sub>CO<sub>3</sub>. The solvent was removed *in vacuo* and the residue was dissolved in hexane. Filtration, evaporation *in vacuo* and purification of the residue by column chromatography (SiO<sub>2</sub>; hexanes: TEA, 150:1) provided **1e** (14 g, 50 mmol) as a colorless oil in 50% yield.

**<sup>1</sup>H NMR** (400 MHz, CDCl<sub>3</sub>): δ 8.11-8.07 (m, 4H), 7.70-7.68 (m, 1H), 7.61-7.56 (m, 2H), 7.48-7.43 (m, 4H), 6.18 (dq, *J* = 17.2, 5.2 Hz, 1H), 5.76 (dt, *J* = 17.2, 1.2 Hz, 1H), 5.43 (dt, *J* = 10.8, 1.2 Hz, 1H).

**<sup>13</sup>C NMR** (100 MHz, CDCl<sub>3</sub>): δ 164.3, 133.5, 131.4, 130.0, 129.1, 128.4, 120.7, 90.0.

**FTIR** (neat): 1736, 1601, 1452, 1316, 1274, 1243, 1178, 1115, 1079, 1059, 1023, 949, 906, 801, 729, 707, 686 cm<sup>-1</sup>.

**HRMS** (CI) Calcd. for C<sub>17</sub>H<sub>14</sub>O<sub>4</sub> [M]<sup>+</sup>: 282.0892, Found: 282.0888.

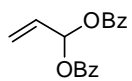

Archive directory:  
 Sample directory:  
 Pulse Sequence: s2pul  
 Solvent: cdcl3  
 Ambient temperature  
 File: HH-BZ-C\_s2pul\_R1  
 INOVA-500 "nmrastor"

Relax. delay 2.000 sec  
 Pulse 30.0 degrees  
 Acq. time 4.000 sec  
 Width 6410.3 Hz  
 32 repetitions  
 OBSERVE H1, 399.8047109 MHz  
 DATA PROCESSING  
 Line broadening 0.1 Hz  
 FT size 65536  
 Total time 3 min, 24 sec

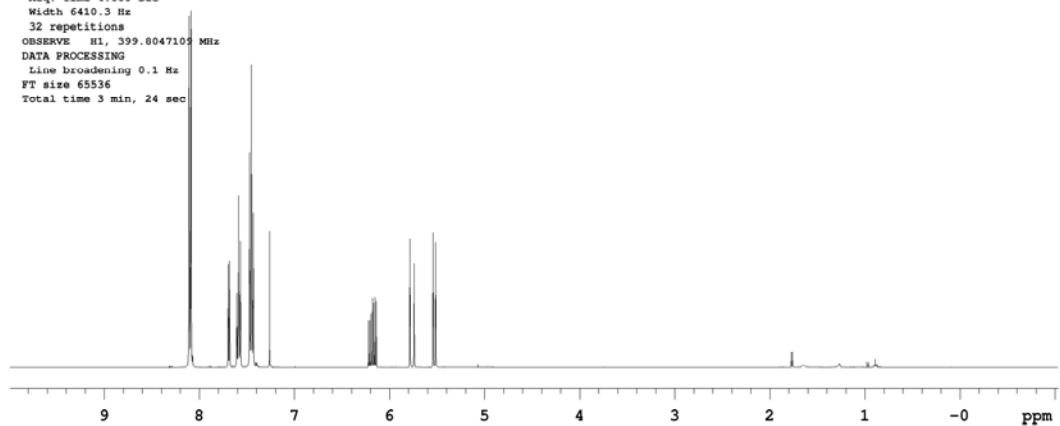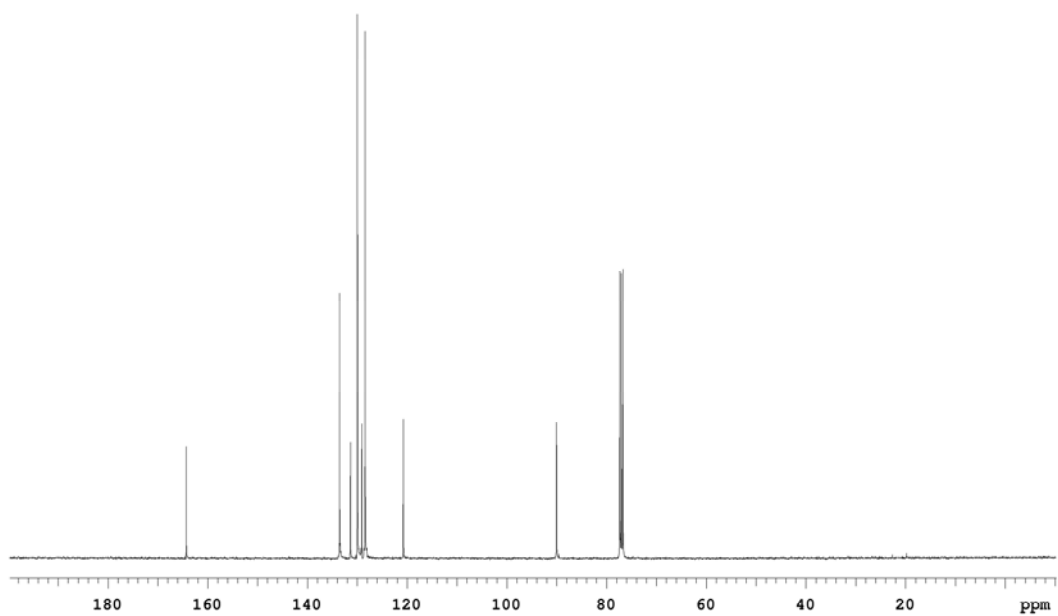

**(1*S*, 2*R*)-1-phenylbut-3-ene-1, 2-diyl dibenzoate**

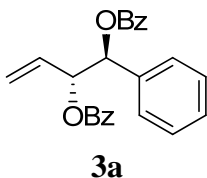

An oven-dried sealed tube under one atmosphere of nitrogen gas was charged with (*R*)-*SEGP*HOS-**I** (10.3 mg, 0.01 mmol, 5 mol%) and THF (1.0 M, 0.2 mL). Benzaldehyde **2a** (21 mg, 0.2 mmol, 100 mol%), acrolein *gem*-dibenzoate **1e** (113 mg, 0.4 mmol, 200 mol%), anhydrous K<sub>3</sub>PO<sub>4</sub> (43 mg, 0.2 mmol, 100 mol%) and isopropanol (24 mg, 0.4 mmol, 200 mol%) were added and the reaction mixture was allowed to stir at 60 °C for 72 hr, at which point the reaction mixture was cooled to ambient temperature. Benzoyl chloride (116 μL, 1.0 mmol, 500 mol%), Et<sub>3</sub>N (270 μL, 2.0 mmol, 1000 mol%), DMAP (1.2 mg, 0.01 mmol, 5 mol%) and CH<sub>2</sub>Cl<sub>2</sub> (0.6 mL) were added. The reaction mixture was allowed to stir at ambient temperature for 20 hr, at which point the reaction mixture was quenched with aqueous NH<sub>4</sub>Cl (3 mL) and extracted with CH<sub>2</sub>Cl<sub>2</sub>. The organic layer was dried (MgSO<sub>4</sub>), filtered and concentrated *in vacuo*. Purification of the residue by column chromatography (SiO<sub>2</sub>; ethyl acetate:hexanes, 1:10) provided **3a** (47 mg, 0.126 mmol) as a colorless oil in 63% yield (18:1 dr).

**<sup>1</sup>H NMR** (400 MHz, CDCl<sub>3</sub>): δ 8.11-8.08 (m, 2H), 8.00-7.98 (m, 2H), 7.60-7.26 (m, 11H), 6.34 (d, *J* = 4.4 Hz, 1H), 6.02-5.93 (m, 2H), 5.42-5.31 (m, 2H).

**<sup>13</sup>C NMR** (100 MHz, CDCl<sub>3</sub>): δ 165.3, 136.1, 133.2, 133.1, 131.5, 129.9, 129.8, 129.7, 129.6, 128.5, 128.4, 128.3, 128.2, 127.2, 119.9, 76.4, 76.3.

**HPLC**: (Chiralcel OJ-H + OJ-H columns, hexanes:*i*-PrOH = 93:7, 0.5 mL/min, 230 nm), *t*<sub>major</sub> = 47.5 min, *t*<sub>minor</sub> = 51.7 min; ee = 99%.

[α]<sub>D</sub><sup>25</sup> = -7.30 (c = 1.31, CH<sub>2</sub>Cl<sub>2</sub>).

**FTIR** (neat): 1711, 1601, 1451, 1314, 1264, 1176, 1106, 1068, 1026, 989, 964, 932, 858, 763, 736, 704, 685 cm<sup>-1</sup>.

**HRMS** (CI) Calcd. for C<sub>24</sub>H<sub>21</sub>O<sub>4</sub> [M+H]<sup>+</sup>: 373.1440, Found: 373.1444.

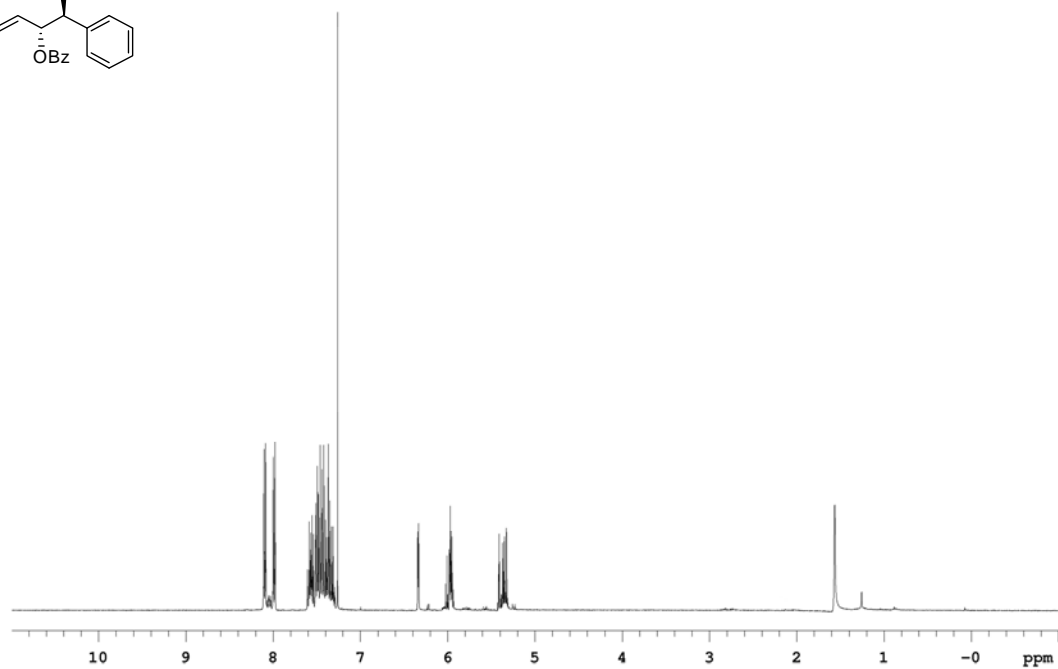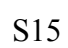

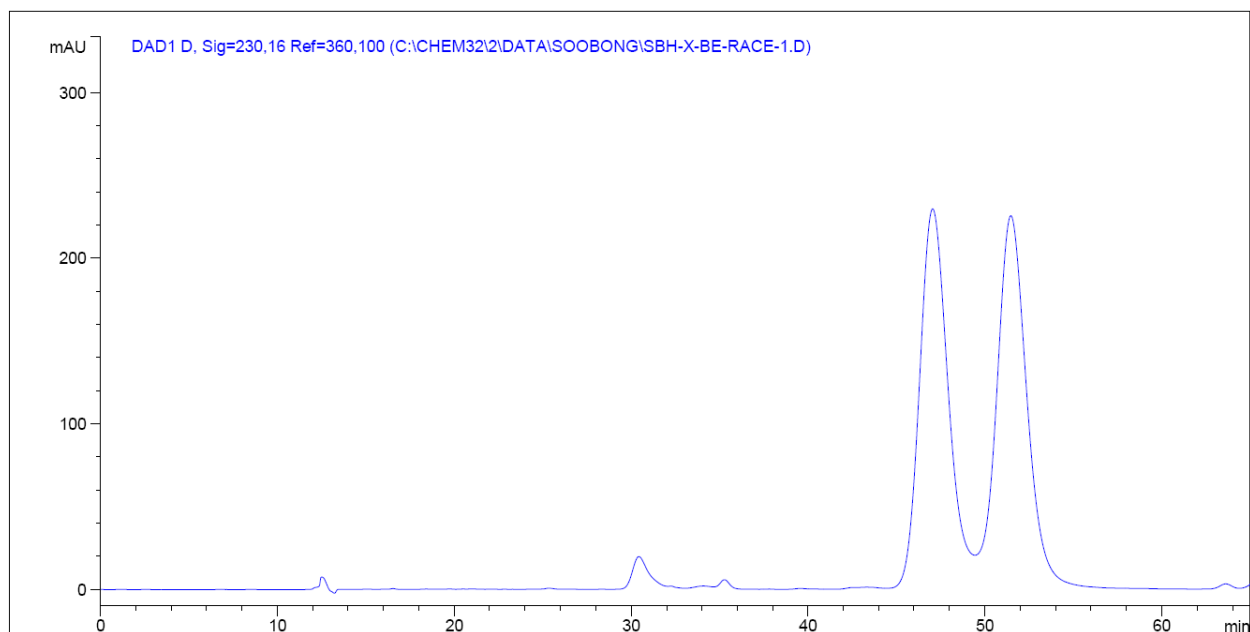

| Peak # | RetTime [min] | Type | Width [min] | Area [mAU*s] | Height [mAU] | Area %  |
|--------|---------------|------|-------------|--------------|--------------|---------|
| 1      | 47.034        | BV   | 1.7081      | 2.53740e4    | 228.04851    | 49.7539 |
| 2      | 51.457        | VB   | 1.7504      | 2.56250e4    | 222.37338    | 50.2461 |

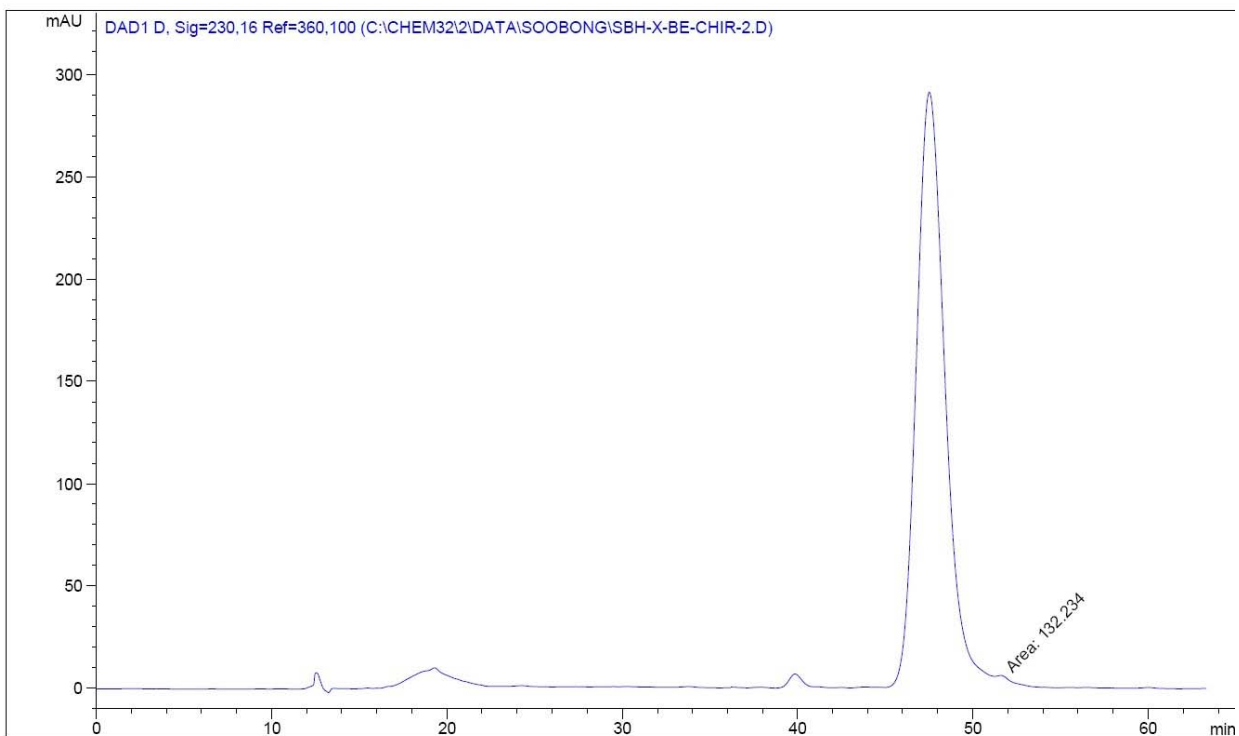

| Peak # | RetTime [min] | Type | Width [min] | Area [mAU*s] | Height [mAU] | Area %  |
|--------|---------------|------|-------------|--------------|--------------|---------|
| 1      | 47.507        | BB   | 1.7091      | 3.18705e4    | 288.43912    | 99.5868 |
| 2      | 51.673        | MM   | 0.7651      | 132.23447    | 2.88064      | 0.4132  |



**(1*S*, 2*R*)-1-(4-bromophenyl)but-3-ene-1, 2-diyl dibenzoate**

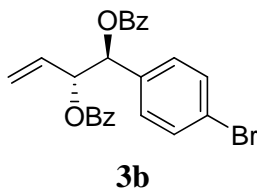

An oven-dried sealed tube under one atmosphere of nitrogen gas was charged with (*R*)-*SEGP*HOS-**I** (10.3 mg, 0.01 mmol, 5 mol%) and THF (1.0 M, 0.2 mL). 4-Bromobenzaldehyde **2b** (37 mg, 0.2 mmol, 100 mol%), acrolein *gem*-dibenzoate **1e** (113 mg, 0.4 mmol, 200 mol%), anhydrous K<sub>3</sub>PO<sub>4</sub> (43 mg, 0.2 mmol, 100 mol%) and isopropanol (24 mg, 0.4 mmol, 200 mol%) were added and the reaction mixture was allowed to stir at 60 °C for 48 hr, at which point the reaction mixture was cooled to ambient temperature. Benzoyl chloride (116 μL, 1.0 mmol, 500 mol%), Et<sub>3</sub>N (270 μL, 2.0 mmol, 1000 mol%), DMAP (1.2 mg, 0.01 mmol, 5 mol%) and CH<sub>2</sub>Cl<sub>2</sub> (0.6 mL) were added. The reaction mixture was allowed to stir at ambient temperature for 20 hr, at which point the reaction mixture was quenched with aqueous NH<sub>4</sub>Cl (3 mL) and extracted with CH<sub>2</sub>Cl<sub>2</sub>. The organic layer was dried (MgSO<sub>4</sub>), filtered and concentrated *in vacuo*. Purification of the residue by column chromatography (SiO<sub>2</sub>; ethyl acetate:hexanes, 1:10) provided **3b** (63 mg, 0.14 mmol) as a colorless oil in 70% yield (16:1 dr).

**<sup>1</sup>H NMR** (400 MHz, CDCl<sub>3</sub>): δ 8.08-8.05 (m, 2H), 8.00-7.97 (m, 2H), 7.61-7.55 (m, 2H), 7.51-7.42 (m, 6H), 7.39-7.26 (m, 2H), 6.26 (d, *J* = 4.0 Hz, 1H), 6.00-5.90 (m, 2H), 5.42-5.33 (m, 2H).

**<sup>13</sup>C NMR** (100 MHz, CDCl<sub>3</sub>): δ 165.2, 165.1, 135.2, 133.4, 133.3, 131.5, 131.3, 129.8, 129.7, 129.6, 129.0, 128.5, 128.4, 122.5, 120.3, 76.0, 75.8.

**HPLC**: (Chiralcel AD-H + OD-H columns, hexanes:*i*-PrOH = 96:4, 0.5 mL/min, 230 nm), *t*<sub>major</sub> = 38.4 min, *t*<sub>minor</sub> = 46.1 min; ee = 90%.

[α]<sub>D</sub><sup>25</sup> = -7.5 (c = 1.73, CH<sub>2</sub>Cl<sub>2</sub>).

**FTIR** (neat): 1721, 1602, 1489, 1451, 1315, 1264, 1177, 1107, 1096, 1070, 1026, 1012, 987, 938, 895, 830, 734, 709 cm<sup>-1</sup>.

**HRMS** (CI) Calcd. for C<sub>24</sub>H<sub>20</sub>O<sub>4</sub>Br [M+H]<sup>+</sup>: 451.0545, Found: 451.0555.

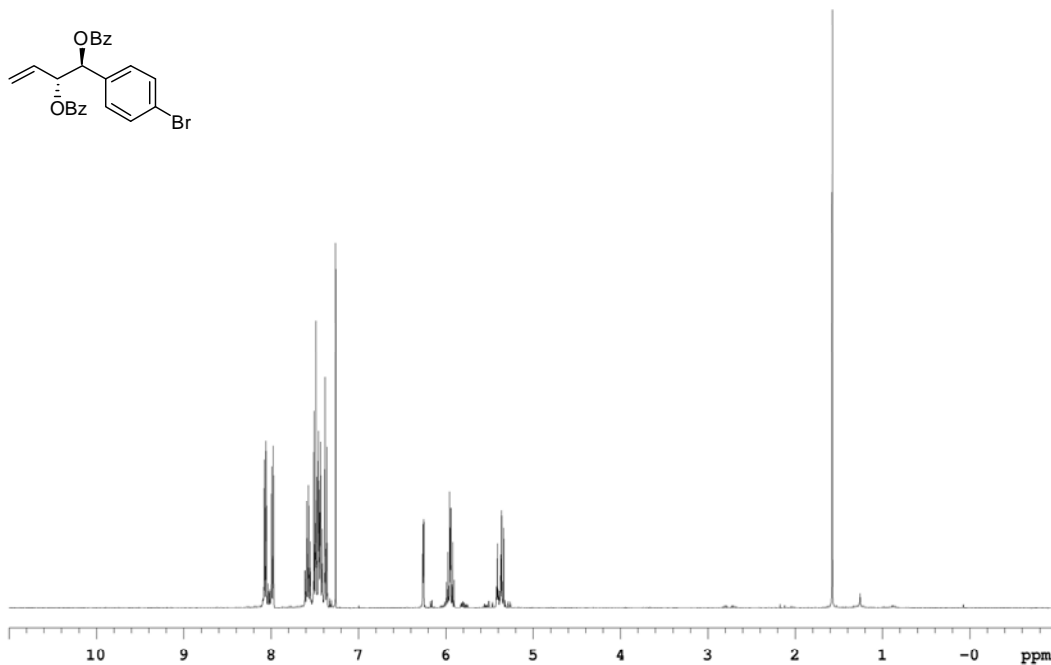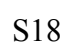

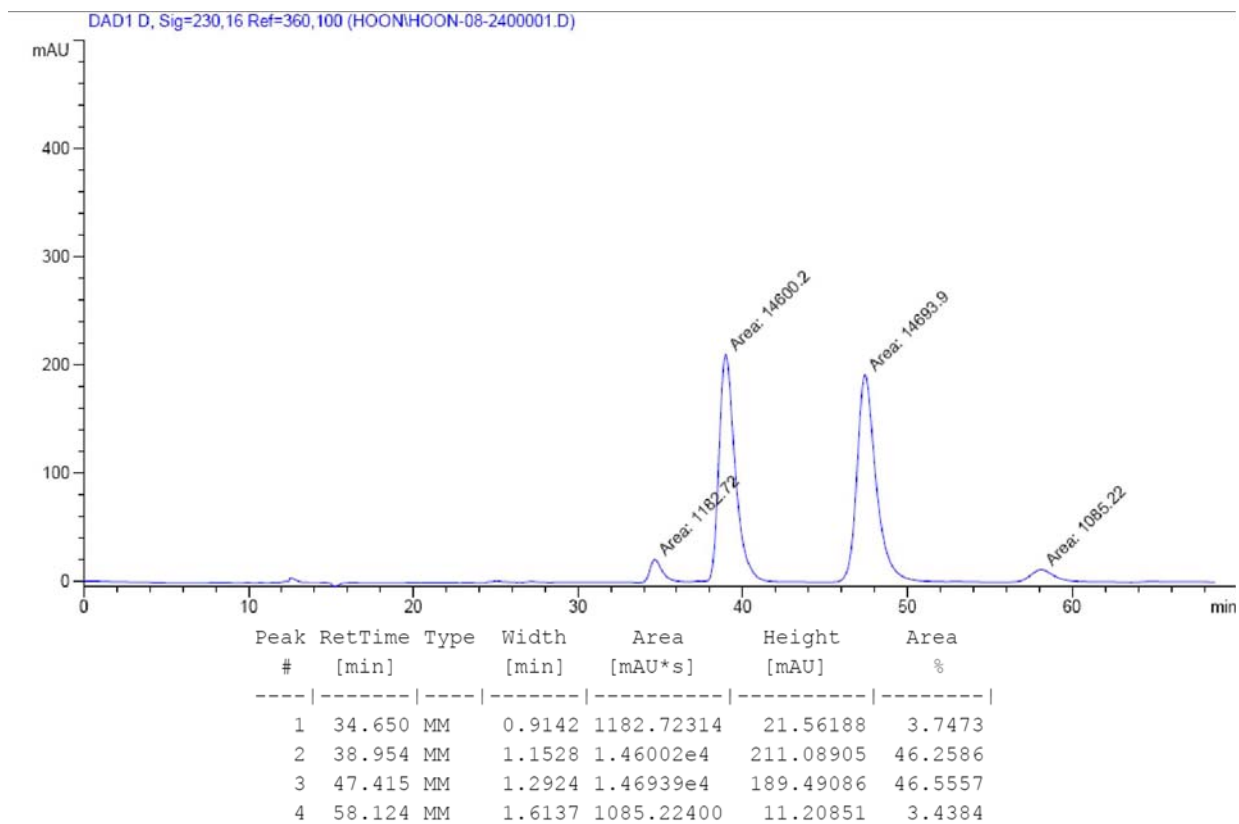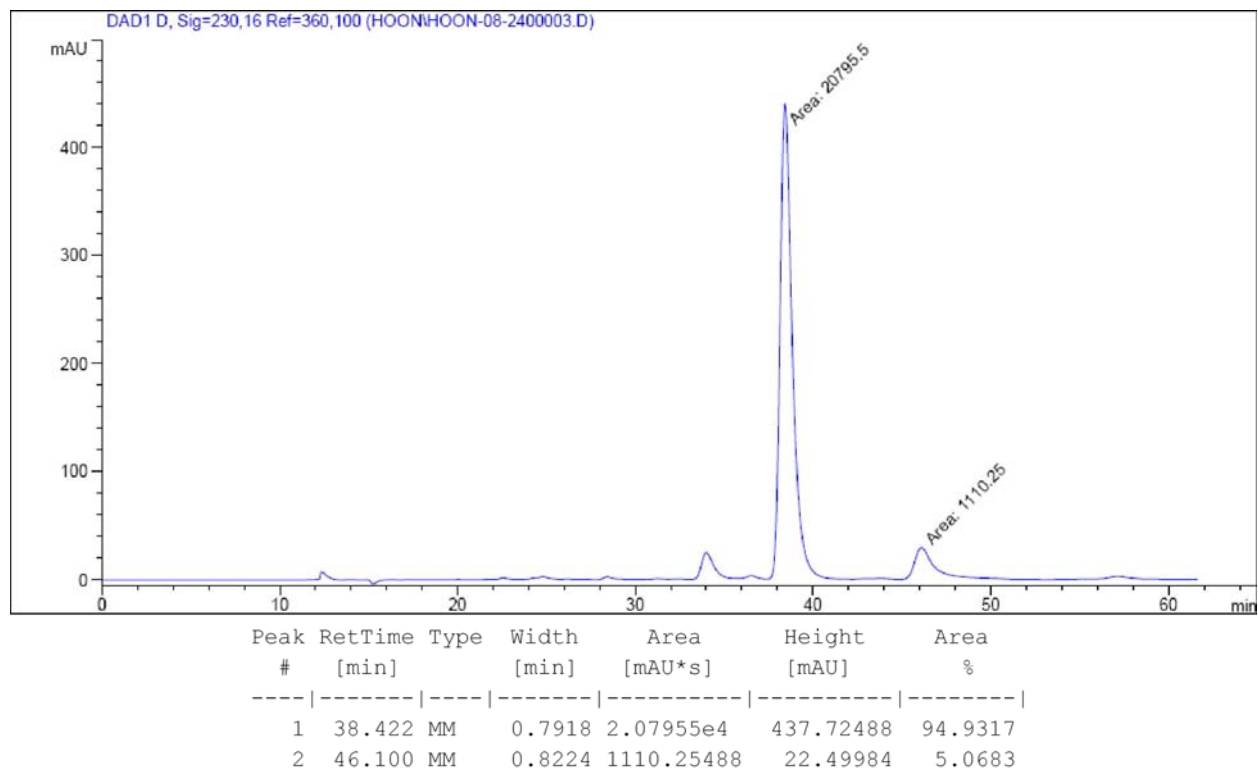

**(1*S*, 2*R*)-1-(4-(methoxycarbonyl)phenyl)but-3-ene-1, 2-diyl dibenzoate**

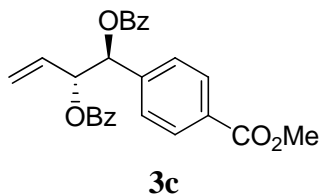

An oven-dried sealed tube under one atmosphere of nitrogen gas was charged with (*R*)-*SEGP*HOS-**I** (10.3 mg, 0.01 mmol, 5 mol%) and THF (1.0 M, 0.2 mL). Methyl 4-formylbenzoate **2c** (33 mg, 0.2 mmol, 100 mol%), acrolein *gem*-dibenzoate **1e** (113 mg, 0.4 mmol, 200 mol%), anhydrous K<sub>3</sub>PO<sub>4</sub> (43 mg, 0.2 mmol, 100 mol%) and isopropanol (24 mg, 0.4 mmol, 200 mol%) were added and the reaction mixture was allowed to stir at 60 °C for 48 hr, at which point the reaction mixture was cooled to ambient temperature. Benzoyl chloride (116 μL, 1.0 mmol, 500 mol%), Et<sub>3</sub>N (270 μL, 2.0 mmol, 1000 mol%), DMAP (1.2 mg, 0.01 mmol, 5 mol%) and CH<sub>2</sub>Cl<sub>2</sub> (0.6 mL) were added. The reaction mixture was allowed to stir at ambient temperature for 20 hr, at which point the reaction mixture was quenched with aqueous NH<sub>4</sub>Cl (3 mL) and extracted with CH<sub>2</sub>Cl<sub>2</sub>. The organic layer was dried (MgSO<sub>4</sub>), filtered and concentrated *in vacuo*. Purification of the residue by column chromatography (SiO<sub>2</sub>; ethyl acetate:hexanes, 1:10) provided **3c** (65 mg, 0.152 mmol) as a colorless oil in 76% yield (14:1 dr).

**<sup>1</sup>H NMR** (400 MHz, CDCl<sub>3</sub>): δ 8.11-8.03 (m, 4H), 8.00-7.97 (m, 2H), 7.62-7.54 (m, 4H), 7.49-7.37 (m, 4H), 6.37 (d, *J* = 4.0 Hz, 1H), 6.00-5.92 (m, 2H), 5.41-5.32 (m, 2H), 3.91 (s, 3H).

**<sup>13</sup>C NMR** (100 MHz, CDCl<sub>3</sub>): δ 166.6, 165.2, 165.1, 141.1, 133.4, 133.3, 131.1, 130.2, 129.8, 129.7, 129.6, 128.5, 128.4, 128.3, 127.2, 126.2, 120.3, 76.1, 76.0, 52.2.

**HPLC**: (Chiralcel OJ-H + OD-H columns, hexanes:*i*-PrOH = 95:5, 0.5 mL/min, 230 nm), *t*<sub>major</sub> = 47.7 min, *t*<sub>minor</sub> = 52.9 min; ee = 99%.

[α]<sub>D</sub><sup>25</sup> = +4.05 (c = 1.42, CH<sub>2</sub>Cl<sub>2</sub>).

**FTIR** (neat): 1719, 1601, 1451, 1436, 1314, 1263, 1178, 1106, 1069, 1026, 987, 937, 855, 803, 772, 733, 708 cm<sup>-1</sup>.

**HRMS** (CI) Calcd. for C<sub>26</sub>H<sub>23</sub>O<sub>6</sub> [M+H]<sup>+</sup>: 413.1495, Found: 431.1497.

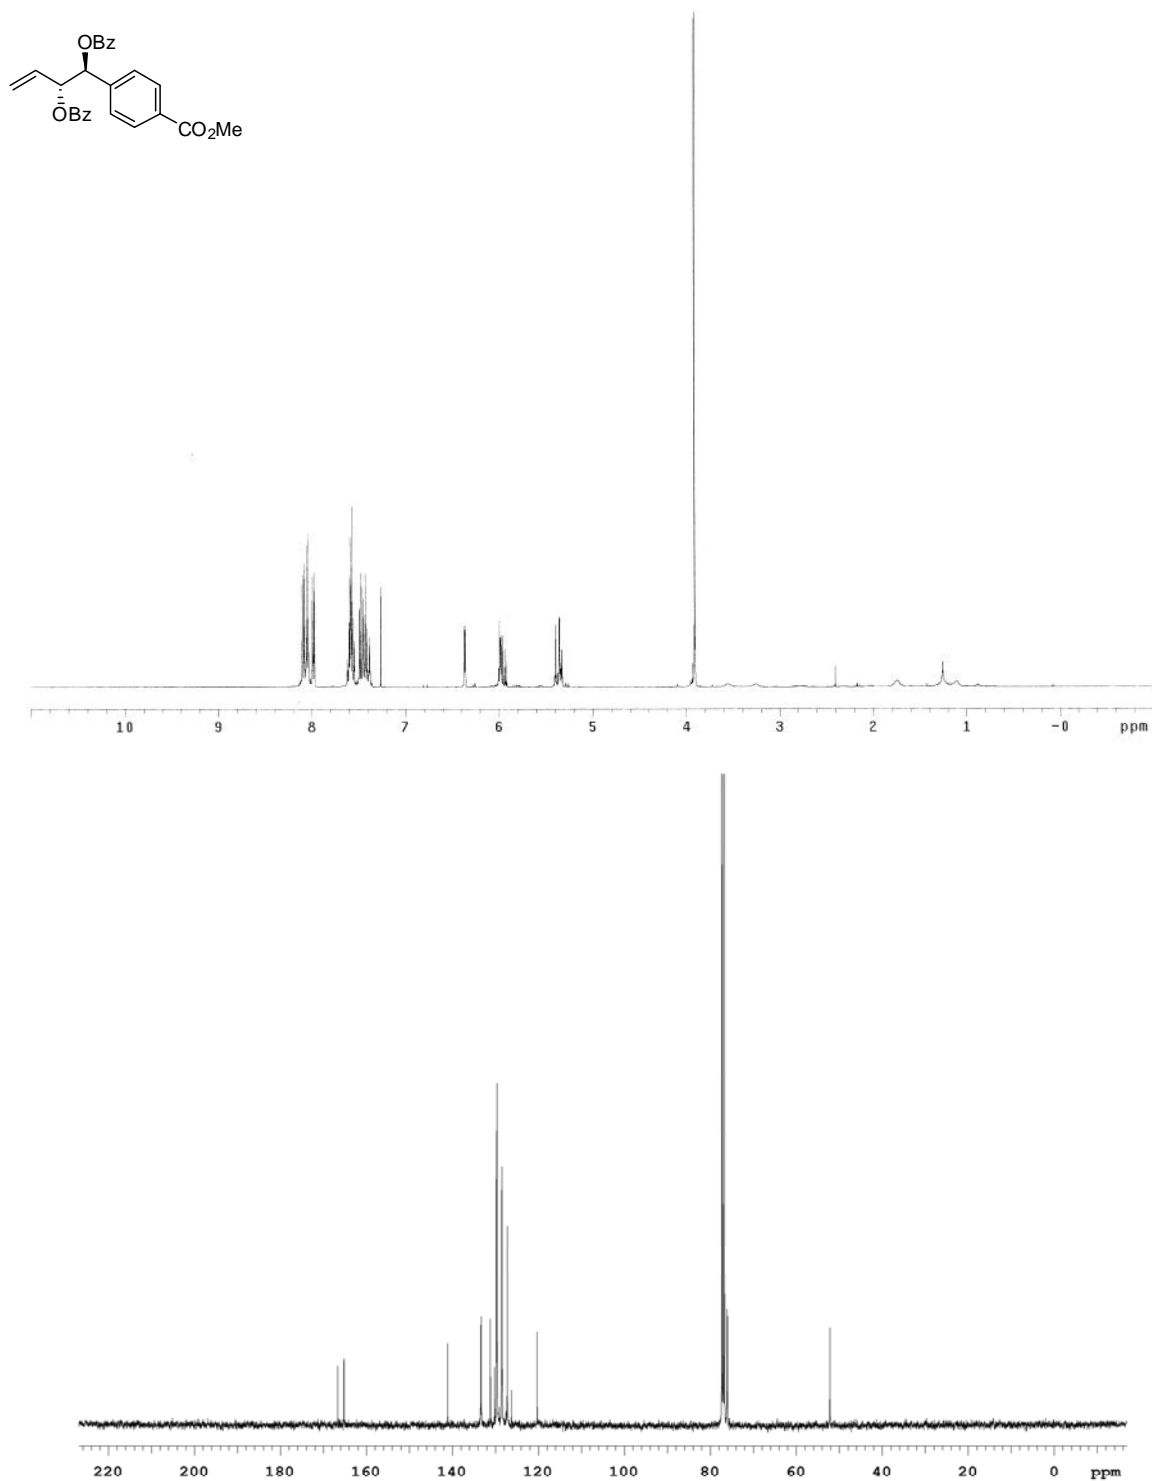

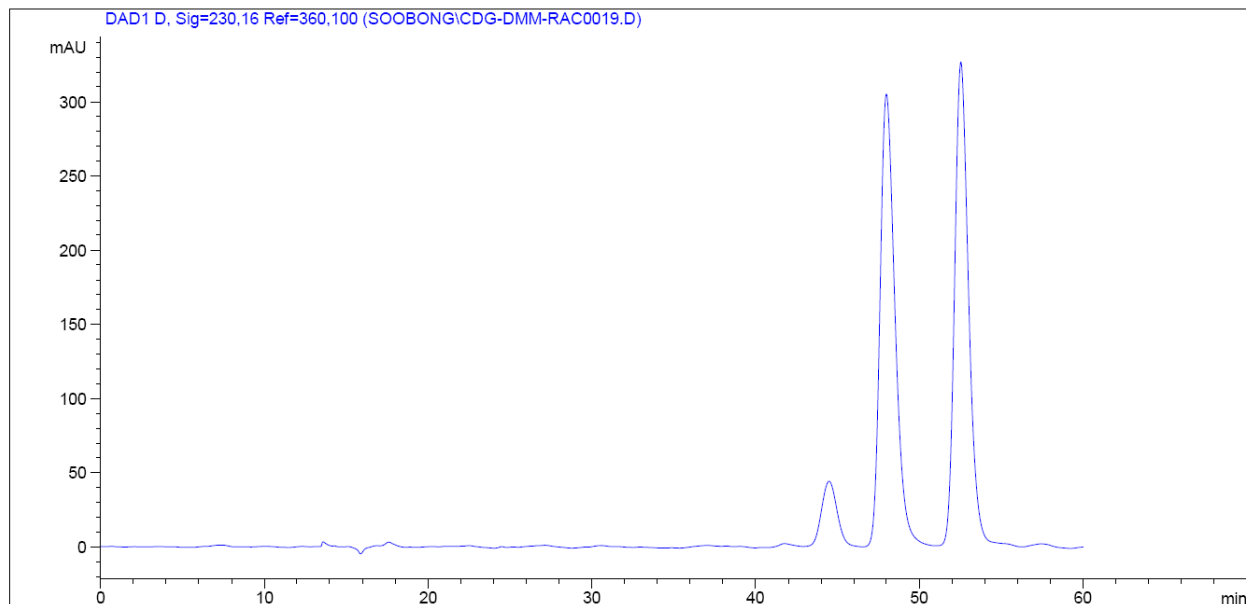

| Peak # | RetTime [min] | Type | Width [min] | Area [mAU*s] | Height [mAU] | Area %  |
|--------|---------------|------|-------------|--------------|--------------|---------|
| 1      | 44.477        | BB   | 1.0228      | 2862.70825   | 43.78297     | 7.0007  |
| 2      | 47.975        | BB   | 0.9641      | 1.90887e4    | 304.19873    | 46.6808 |
| 3      | 52.524        | BB   | 0.8964      | 1.89405e4    | 324.77338    | 46.3185 |

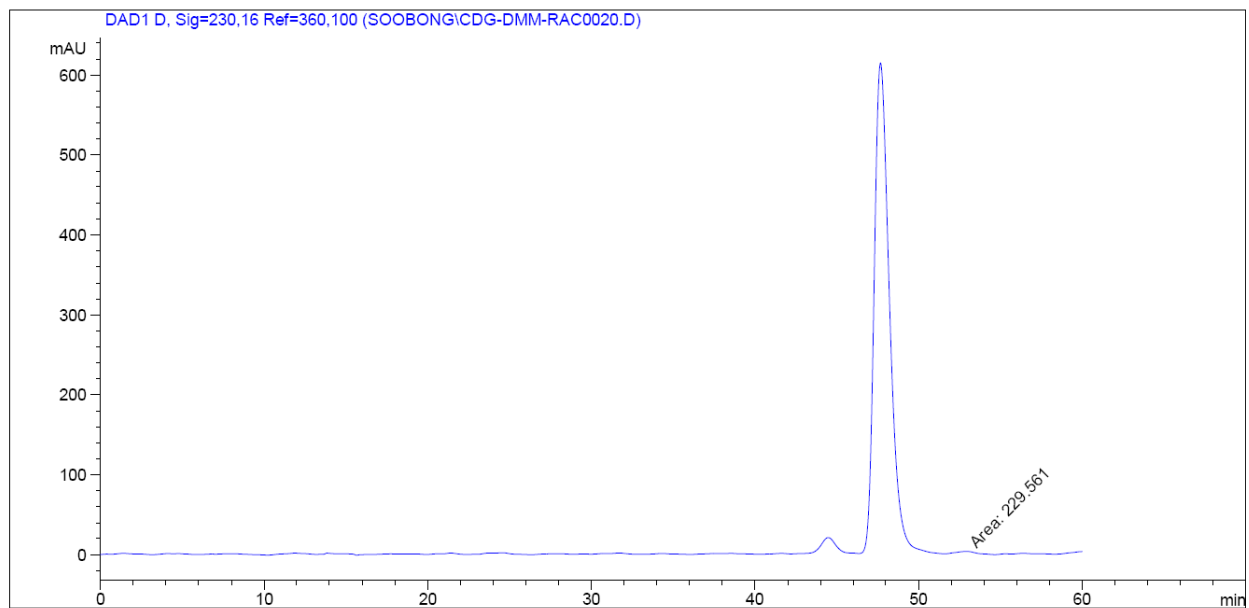

| Peak # | RetTime [min] | Type | Width [min] | Area [mAU*s] | Height [mAU] | Area %  |
|--------|---------------|------|-------------|--------------|--------------|---------|
| 1      | 47.658        | BB   | 0.9798      | 3.95134e4    | 613.18939    | 99.4224 |
| 2      | 52.899        | MM   | 0.8887      | 229.56148    | 4.30505      | 0.5776  |

**(1*S*, 2*R*)-1-(4-nitrophenyl)but-3-ene-1, 2-diyl dibenzoate**

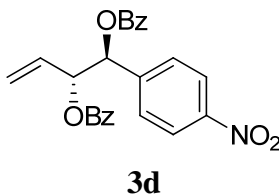

An oven-dried sealed tube under one atmosphere of nitrogen gas was charged with (*R*)-*SEGP*HOS-**I** (10.3 mg, 0.01 mmol, 5 mol%) and THF (1.0 M, 0.2 mL). 4-Nitrobenzaldehyde **2d** (30 mg, 0.2 mmol, 100 mol%), acrolein *gem*-dibenzoate **1e** (113 mg, 0.4 mmol, 200 mol%), anhydrous K<sub>3</sub>PO<sub>4</sub> (43 mg, 0.2 mmol, 100 mol%) and isopropanol (24 mg, 0.4 mmol, 200 mol%) were added and the reaction mixture was allowed to stir at 60 °C for 48 hr, at which point the reaction mixture was cooled to ambient temperature. Benzoyl chloride (116 μL, 1.0 mmol, 500 mol%), Et<sub>3</sub>N (270 μL, 2.0 mmol, 1000 mol%), DMAP (1.2 mg, 0.01 mmol, 5 mol%) and CH<sub>2</sub>Cl<sub>2</sub> (0.6 mL) were added. The reaction mixture was allowed to stir at ambient temperature for 20 hr, at which point the reaction mixture was quenched with aqueous NH<sub>4</sub>Cl (3 mL) and extracted with CH<sub>2</sub>Cl<sub>2</sub>. The organic layer was dried (MgSO<sub>4</sub>), filtered and concentrated *in vacuo*. Purification of the residue by column chromatography (SiO<sub>2</sub>; ethyl acetate:hexanes, 1:10) provided **3d** (64 mg, 0.154 mmol) as a colorless oil in 77% yield (11:1 dr).

**<sup>1</sup>H NMR** (400 MHz, CDCl<sub>3</sub>): δ 8.25-8.22 (m, 2H), 8.09-8.06 (m, 2H), 7.99-7.96 (m, 2H), 7.68-7.66 (m, 2H), 7.62-7.56 (m, 2H), 7.50-7.42 (m, 4H), 6.36 (d, *J* = 4.4 Hz, 1H), 6.02-5.92 (m, 2H), 5.41-5.36 (m, 2H).

**<sup>13</sup>C NMR** (100 MHz, CDCl<sub>3</sub>): δ 165.1, 147.9, 143.3, 133.7, 133.5, 130.9, 129.8, 129.6, 129.4, 129.2, 128.7, 128.6, 128.2, 123.6, 120.7, 75.8, 75.6.

**HPLC**: (Chiralcel OJ-H column, hexanes:*i*-PrOH = 95:5, 1.0 mL/min, 230 nm), *t*<sub>minor</sub> = 35.7 min, *t*<sub>major</sub> = 44.1 min; ee = 99%.

[α]<sub>D</sub><sup>25</sup> = -25.3 (c = 0.75, CH<sub>2</sub>Cl<sub>2</sub>).

**FTIR** (neat): 1721, 1602, 1522, 1451, 1347, 1315, 1262, 1177, 1095, 1069, 1026, 987, 937, 855, 709 cm<sup>-1</sup>.

**HRMS** (CI) Calcd. for C<sub>24</sub>H<sub>20</sub>O<sub>6</sub>N [M+H]<sup>+</sup>: 418.1291, Found: 418.1289.

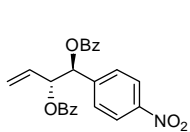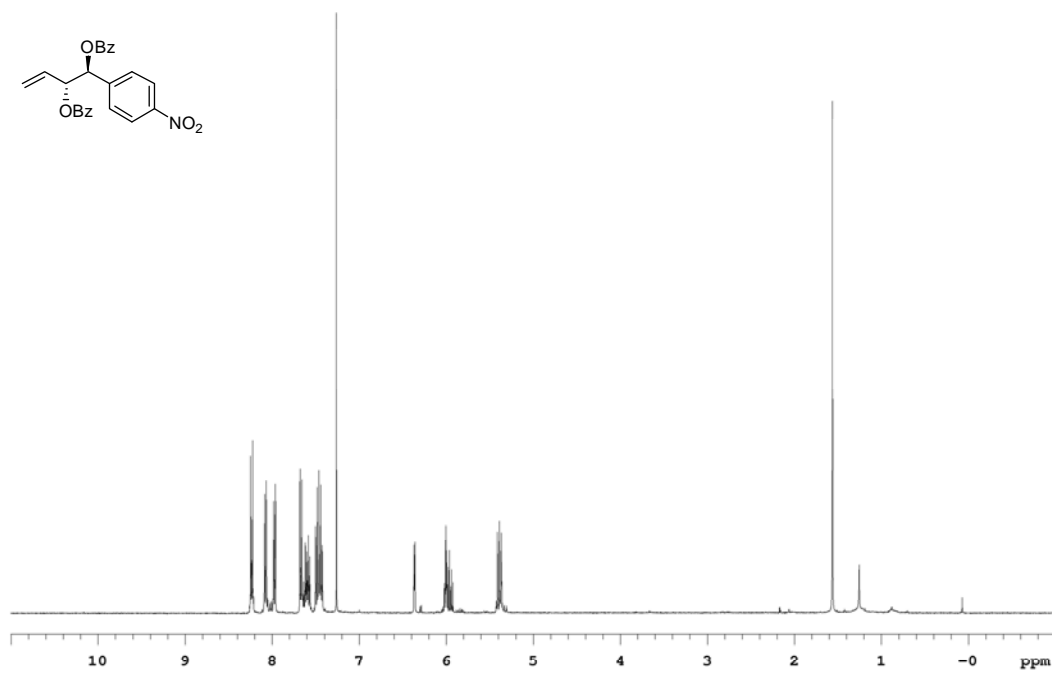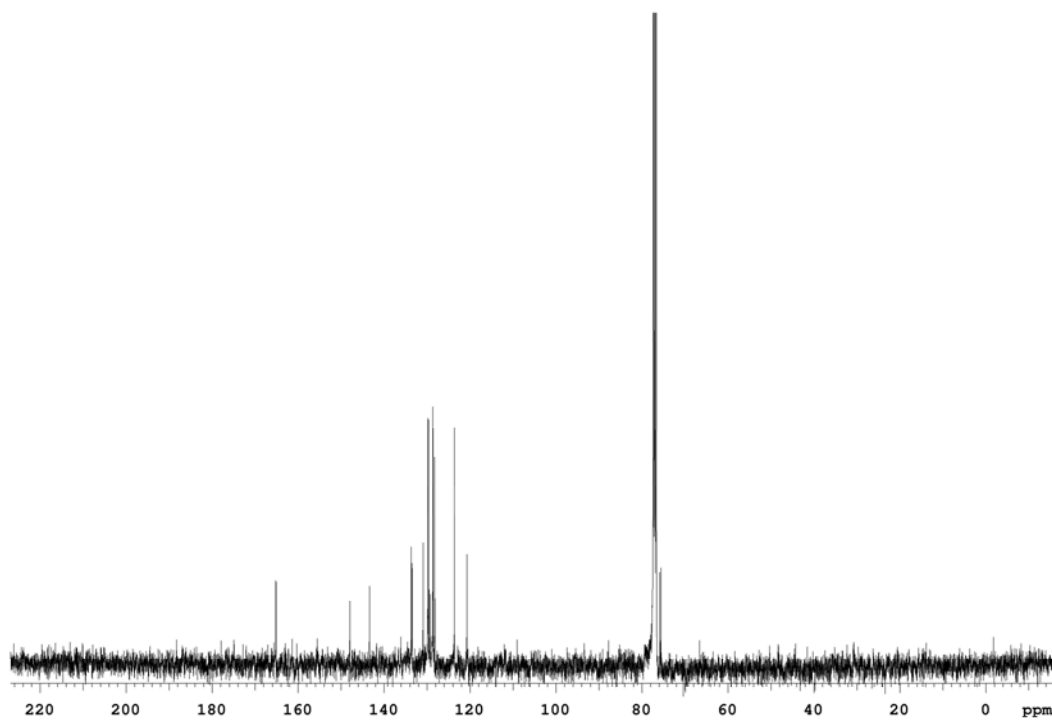



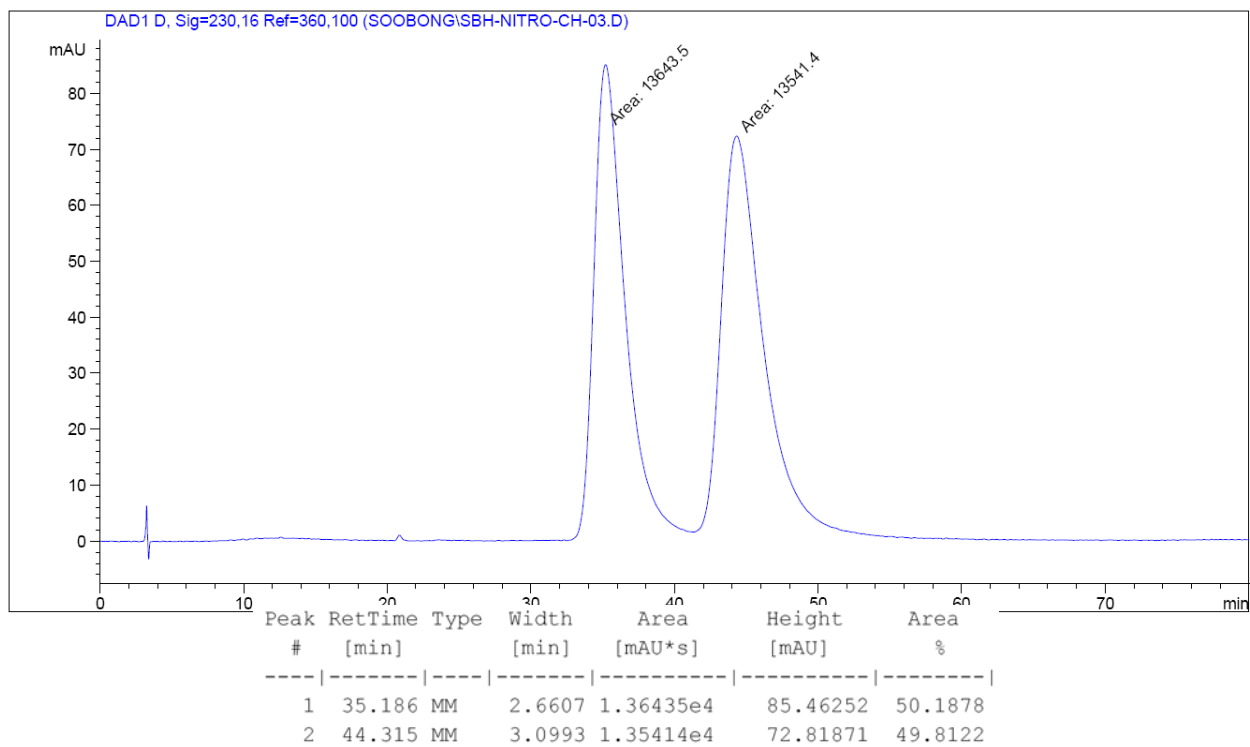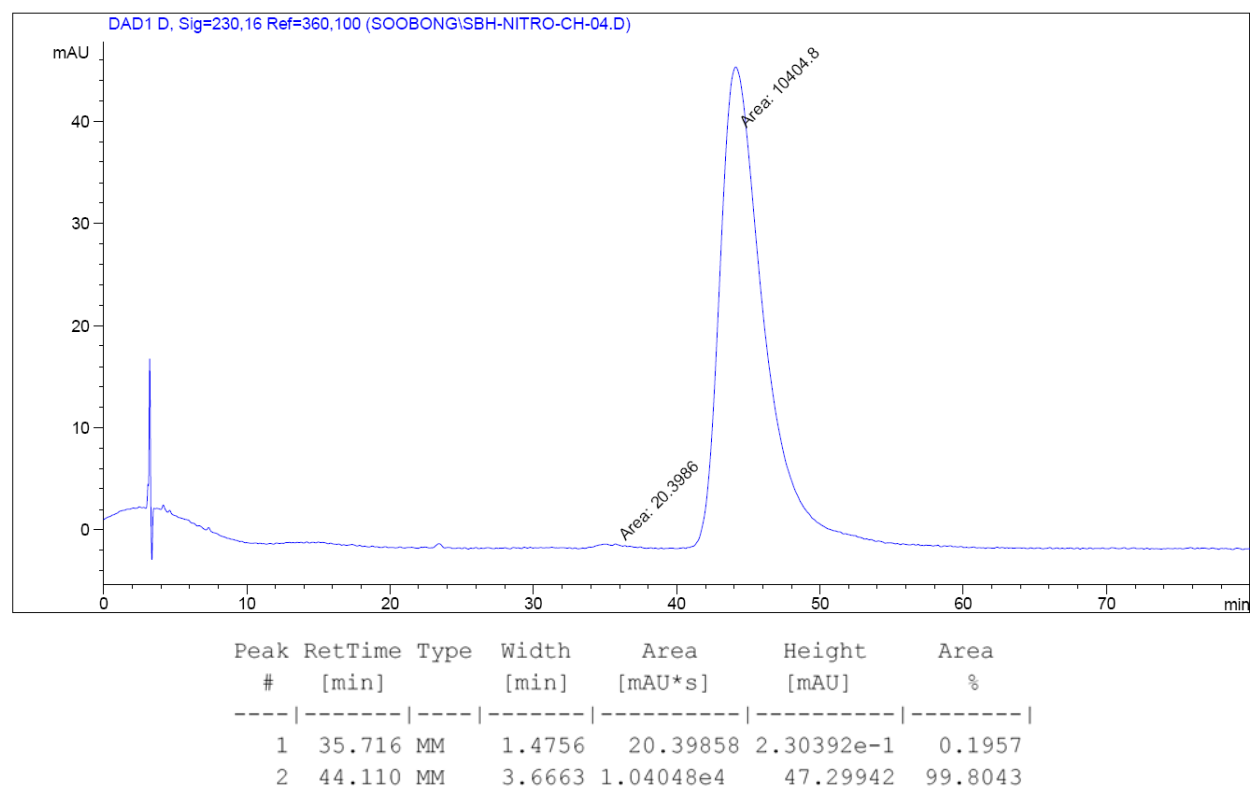

**(1*S*, 2*R*)-1-(6-bromopyridin-2-yl)but-3-ene-1, 2-diyl dibenzoate**

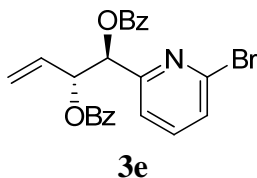

An oven-dried sealed tube under one atmosphere of nitrogen gas was charged with (*R*)-*SEGPHOS*-**I** (10.3 mg, 0.01 mmol, 5 mol%) and THF (1.0 M, 0.2 mL). 6-Bromopyridine-2-carboxaldehyde **2e** (37 mg, 0.2 mmol, 100 mol%), acrolein *gem*-dibenzoate **1e** (113 mg, 0.4 mmol, 200 mol%), anhydrous K<sub>3</sub>PO<sub>4</sub> (43 mg, 0.2 mmol, 100 mol%) and isopropanol (24 mg, 0.4 mmol, 200 mol%) were added and the reaction mixture was allowed to stir at 60 °C for 48 hr, at which point the reaction mixture was cooled to ambient temperature. Benzoyl chloride (116 μL, 1.0 mmol, 500 mol%), Et<sub>3</sub>N (270 μL, 2.0 mmol, 1000 mol%), DMAP (1.2 mg, 0.01 mmol, 5 mol%) and CH<sub>2</sub>Cl<sub>2</sub> (0.6 mL) were added. The reaction mixture was allowed to stir at ambient temperature for 20 hr, at which point the reaction mixture was quenched with aqueous NH<sub>4</sub>Cl (3 mL) and extracted with CH<sub>2</sub>Cl<sub>2</sub>. The organic layer was dried (MgSO<sub>4</sub>), filtered and concentrated *in vacuo*. Purification of the residue by column chromatography (SiO<sub>2</sub>; ethyl acetate:hexanes, 1:7) provided **3e** (64 mg, 0.142 mmol) as a colorless oil in 71% yield (10:1 dr).

**<sup>1</sup>H NMR** (400 MHz, CDCl<sub>3</sub>): δ 8.13-8.10 (m, 2H), 7.99-7.97 (m, 2H), 7.63-7.60 (m, 1H), 7.57-7.47 (m, 4H), 7.43-7.38 (m, 4H), 6.41 (d, *J* = 4.8 Hz, 1H), 6.19-6.16 (m, 1H), 6.06-5.98 (m, 1H), 5.42-5.32 (m, 2H).

**<sup>13</sup>C NMR** (100 MHz, CDCl<sub>3</sub>): δ 165.2, 165.1, 157.4, 141.5, 138.8, 133.5, 133.1, 131.2, 129.9, 129.8, 129.7, 129.4, 128.6, 128.4, 127.7, 120.3, 120.1, 76.3, 75.6.

**HPLC**: (Chiralcel OJ-H column, hexanes:*i*-PrOH = 95:5, 1.0 mL/min, 230 nm), *t*<sub>major</sub> = 20.4 min, *t*<sub>minor</sub> = 33.5 min; ee = 99%.

[α]<sub>D</sub><sup>25</sup> = +1.96 (c = 1.53, CH<sub>2</sub>Cl<sub>2</sub>).

**FTIR** (neat): 1721, 1601, 1582, 1558, 1451, 1436, 1409, 1315, 1263, 1177, 1157, 1105, 1094, 1069, 1026, 986, 937, 795, 735, 708, 687, 670 cm<sup>-1</sup>.

**HRMS** (CI) Calcd. for C<sub>23</sub>H<sub>19</sub>NO<sub>4</sub>Br [M+H]<sup>+</sup>: 452.0497, Found: 452.0501.

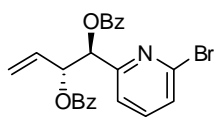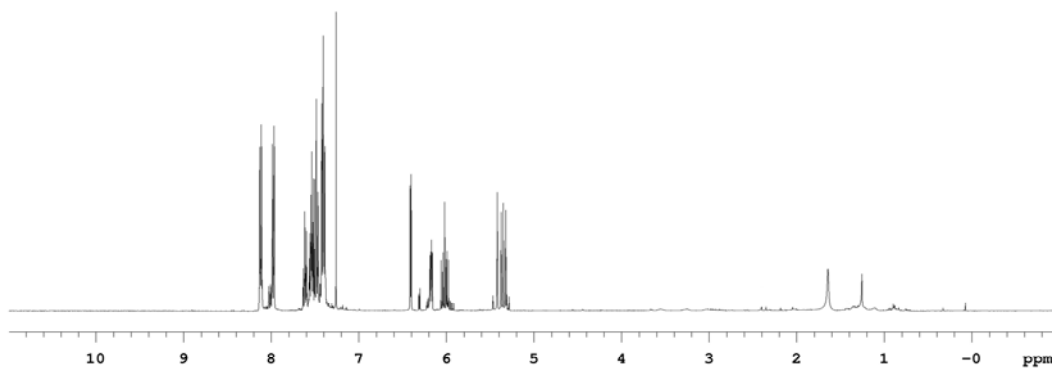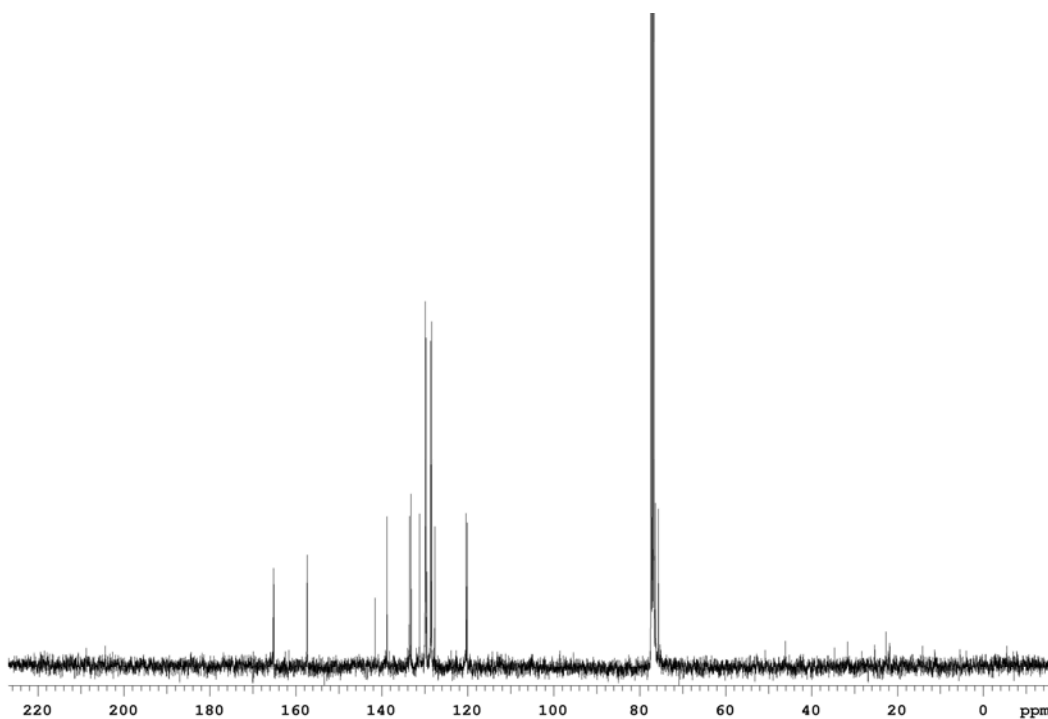

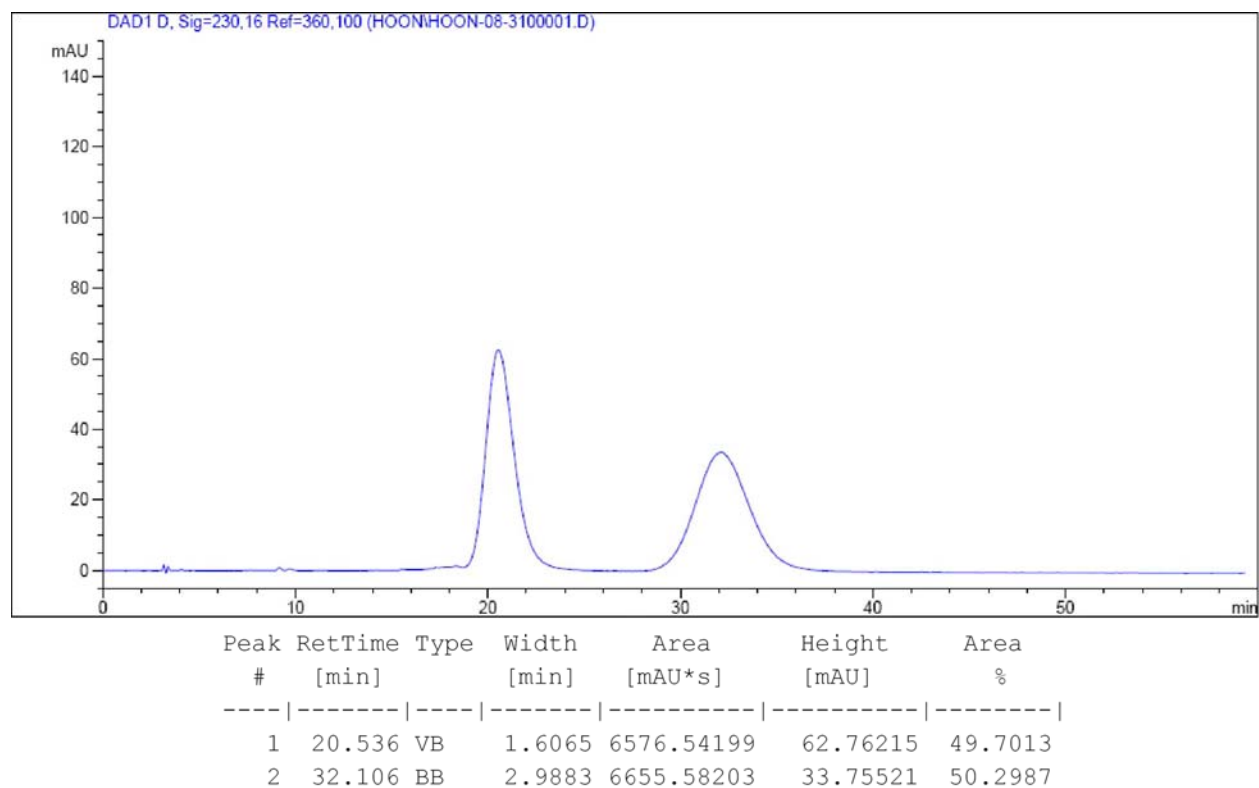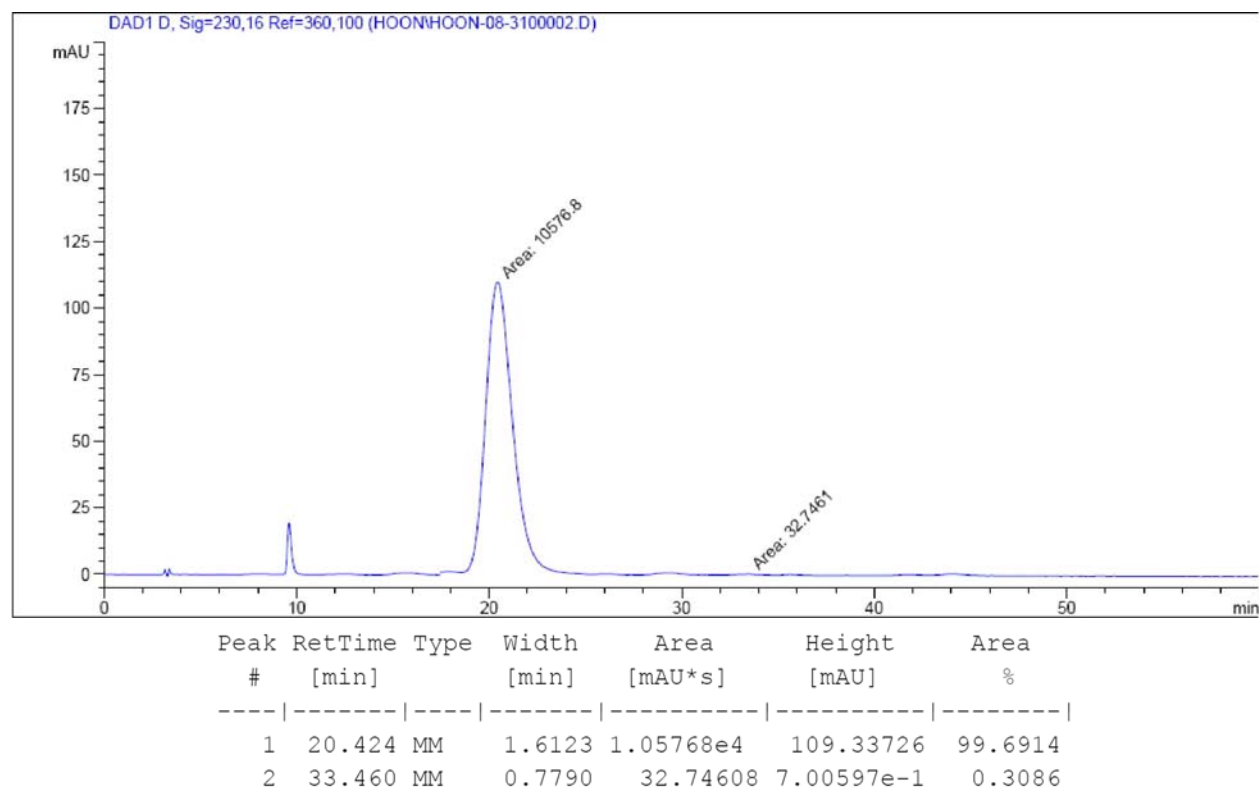

**(3*S*, 4*R*, *E*)-1-phenylhexa-1,5-diene-3, 4-diyl dibenzoate**

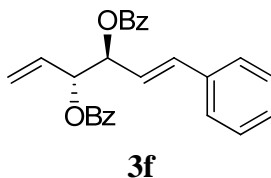

An oven-dried sealed tube under one atmosphere of nitrogen gas was charged with (*R*)-*SEGP*HOS-**I** (10.3 mg, 0.01 mmol, 5 mol%) and THF (1.0 M, 0.2 mL). Cinnamaldehyde **2f** (26 mg, 0.2 mmol, 100 mol%), acrolein *gem*-dibenzoate **1e** (113 mg, 0.4 mmol, 200 mol%), anhydrous K<sub>3</sub>PO<sub>4</sub> (43 mg, 0.2 mmol, 100 mol%) and isopropanol (24 mg, 0.4 mmol, 200 mol%) were added and the reaction mixture was allowed to stir at 60 °C for 72 hr, at which point the reaction mixture was cooled to ambient temperature. Benzoyl chloride (116 μL, 1.0 mmol, 500 mol%), Et<sub>3</sub>N (270 μL, 2.0 mmol, 1000 mol%), DMAP (1.2 mg, 0.01 mmol, 5 mol%) and CH<sub>2</sub>Cl<sub>2</sub> (0.6 mL) were added. The reaction mixture was allowed to stir at ambient temperature for 20 hr, at which point the reaction mixture was quenched with aqueous NH<sub>4</sub>Cl (3 mL) and extracted with CH<sub>2</sub>Cl<sub>2</sub>. The organic layer was dried (MgSO<sub>4</sub>), filtered and concentrated *in vacuo*. Purification of the residue by column chromatography (SiO<sub>2</sub>; ethyl acetate:hexanes, 1:20) provided **3f** (65 mg, 0.164 mmol) as a colorless oil in 82% yield (16:1 dr).

**<sup>1</sup>H NMR** (400 MHz, CDCl<sub>3</sub>): δ 8.07-8.04 (m, 4H), 7.59-7.55 (m, 2H), 7.47-7.40 (m, 6H), 7.35-7.26 (m, 3H), 6.83 (d, *J* = 16.0 Hz, 1H), 6.34 (dd, *J* = 17.2, 7.6 Hz, 1H), 6.11-6.03 (m, 1H), 6.00-5.97 (m, 1H), 5.90-5.87 (m, 1H), 5.52 (dt, *J* = 17.2, 1.2 Hz, 1H), 5.41 (dt, *J* = 10.4, 1.2 Hz, 1H).

**<sup>13</sup>C NMR** (100 MHz, CDCl<sub>3</sub>): δ 165.4, 135.9, 135.3, 133.2, 131.8, 130.0, 129.9, 129.7, 128.6, 128.4, 128.3, 126.8, 122.6, 120.0, 75.8, 75.5.

**HPLC**: (Chiralcel OD-H + OD-H columns, hexanes:*i*-PrOH = 95:5, 0.3 mL/min, 254 nm), *t*<sub>minor</sub> = 39.4 min, *t*<sub>major</sub> = 40.7 min; ee = 94%.

[α]<sub>D</sub><sup>25</sup> = +14.26 (c = 2.23, CH<sub>2</sub>Cl<sub>2</sub>).

**FTIR** (neat): 1720, 1602, 1451, 1315, 1264, 1177, 1108, 1069, 1026, 967, 734, 708 cm<sup>-1</sup>.

**HRMS** (CI) Calcd. for C<sub>26</sub>H<sub>23</sub>O<sub>4</sub> [M+H]<sup>+</sup>: 399.1596, Found: 399.1593.

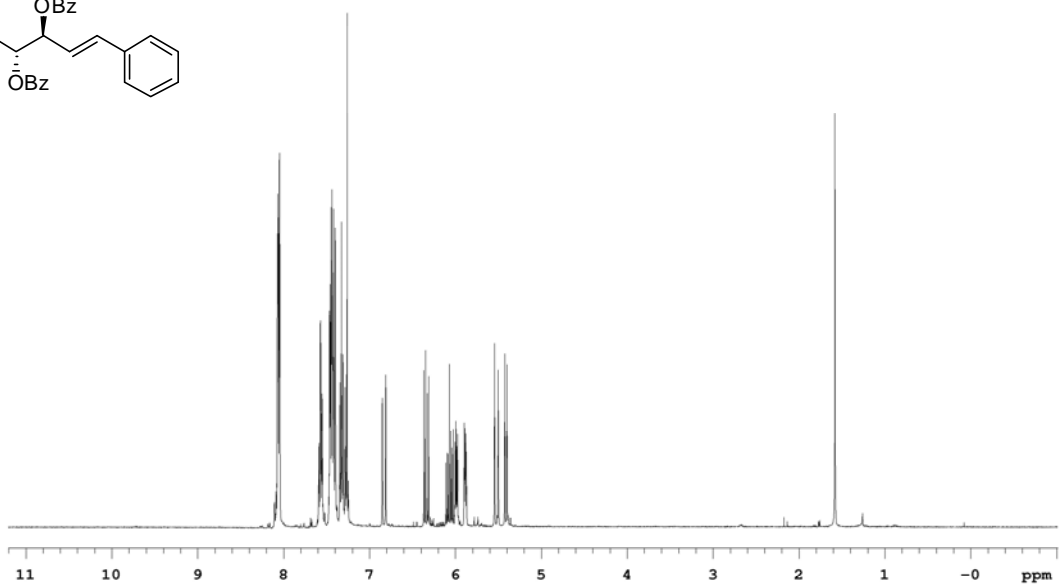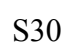

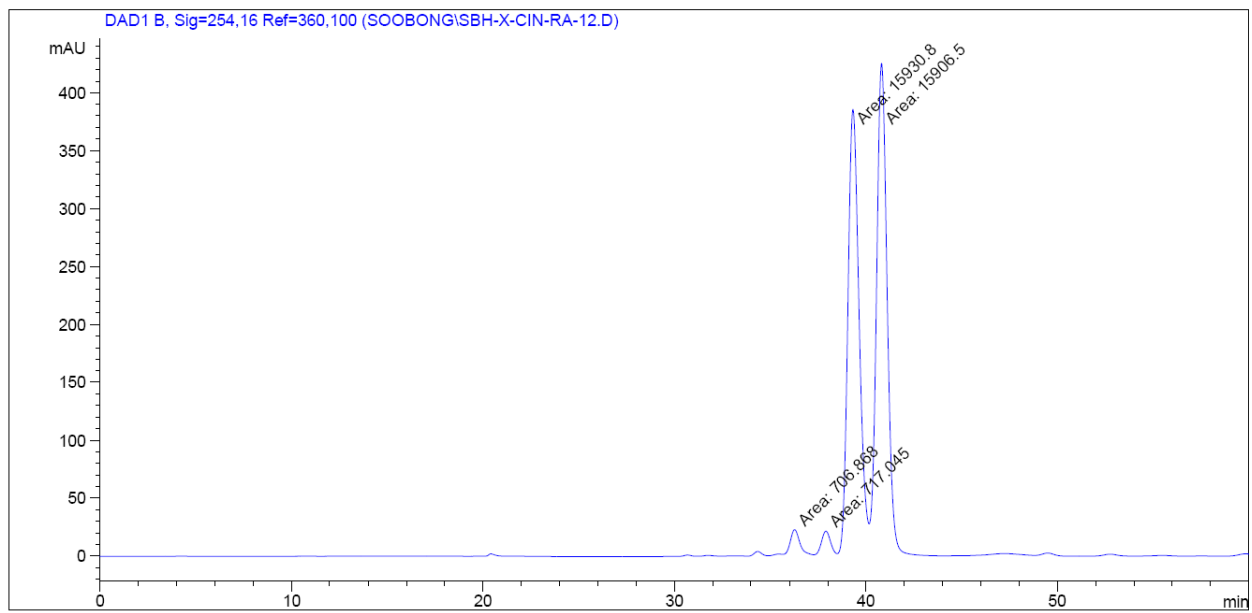

| Peak # | RetTime [min] | Type | Width [min] | Area [mAU*s] | Height [mAU] | Area %  |
|--------|---------------|------|-------------|--------------|--------------|---------|
| 1      | 36.266        | MM   | 0.5374      | 706.86798    | 21.92301     | 2.1252  |
| 2      | 37.899        | MM   | 0.5642      | 717.04517    | 21.18078     | 2.1558  |
| 3      | 39.313        | MM   | 0.6888      | 1.59308e4    | 385.44916    | 47.8961 |
| 4      | 40.806        | MM   | 0.6238      | 1.59065e4    | 424.95596    | 47.8229 |

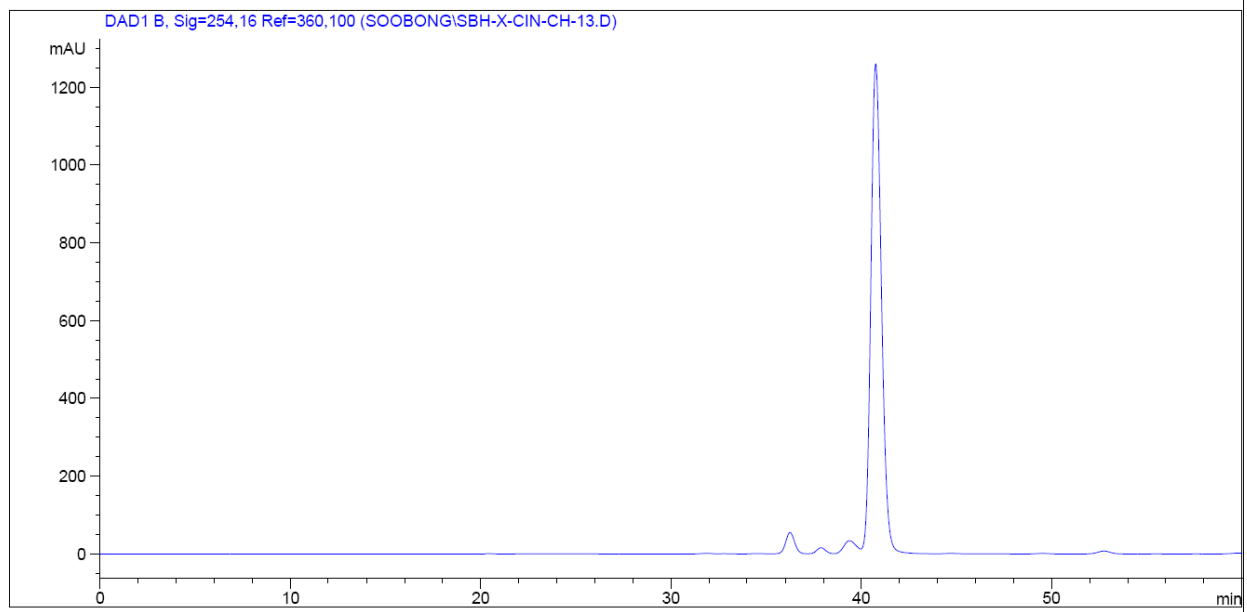

| Peak # | RetTime [min] | Type | Width [min] | Area [mAU*s] | Height [mAU] | Area %  |
|--------|---------------|------|-------------|--------------|--------------|---------|
| 1      | 39.372        | VV   | 0.7025      | 1492.40503   | 33.07291     | 2.9853  |
| 2      | 40.747        | VB   | 0.6012      | 4.85001e4    | 1259.55396   | 97.0147 |

**(3*R*, 4*S*, *E*)-octa-1,5-diene-3,4-diyl dibenzoate**

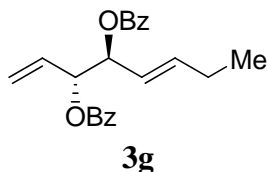

An oven-dried sealed tube under one atmosphere of nitrogen gas was charged with (*R*)-*SEGPHOS*-**I** (10.3 mg, 0.01 mmol, 5 mol%) and THF (1.0 M, 0.2 mL). (*E*)-Pent-3-enal **2g** (17 mg, 0.2 mmol, 100 mol%), acrolein *gem*-dibenzoate **1e** (113 mg, 0.4 mmol, 200 mol%), anhydrous K<sub>3</sub>PO<sub>4</sub> (43 mg, 0.2 mmol, 100 mol%) and isopropanol (24 mg, 0.4 mmol, 200 mol%) were added and the reaction mixture was allowed to stir at 60 °C for 48 hr, at which point the reaction mixture was cooled to ambient temperature. Benzoyl chloride (116 μL, 1.0 mmol, 500 mol%), Et<sub>3</sub>N (270 μL, 2.0 mmol, 1000 mol%), DMAP (1.2 mg, 0.01 mmol, 5 mol%) and CH<sub>2</sub>Cl<sub>2</sub> (0.6 mL) were added. The reaction mixture was allowed to stir at ambient temperature for 20 hr, at which point the reaction mixture was quenched with aqueous NH<sub>4</sub>Cl (3 mL) and extracted with CH<sub>2</sub>Cl<sub>2</sub>. The organic layer was dried (MgSO<sub>4</sub>), filtered and concentrated *in vacuo*. Purification of the residue by column chromatography (SiO<sub>2</sub>; ethyl acetate:hexanes, 1:20) provided **3g** (50 mg, 0.142 mmol) as a colorless oil in 71% yield (13:1 dr).

**<sup>1</sup>H NMR** (400 MHz, CDCl<sub>3</sub>): δ 8.05-8.02 (m, 4H), 7.58-7.54 (m, 2H), 7.45-7.41 (m, 4H), 6.05-5.96 (m, 2H), 5.78-5.74 (m, 2H), 5.63-5.57 (m, 1H), 5.47 (dt, *J* = 17.2, 1.2 Hz, 1H), 5.37 (dt, *J* = 10.4, 1.2 Hz, 1H), 2.13-2.06 (m, 2H), 0.98 (t, *J* = 7.2 Hz, 3H).

**<sup>13</sup>C NMR** (100 MHz, CDCl<sub>3</sub>): δ 165.4, 139.1, 133.1, 133.0, 131.9, 130.2, 130.1, 129.7, 128.4, 122.4, 119.7, 75.8, 75.6, 25.4, 13.1.

**HPLC**: (Chiralcel AD-H + AD-H columns, hexanes:*i*-PrOH = 98:2, 0.5 mL/min, 230 nm), *t*<sub>major</sub> = 35.3 min, *t*<sub>minor</sub> = 37.6 min; ee = 98%.

[α]<sub>D</sub><sup>25</sup> = +9.0 (c = 2.00, CH<sub>2</sub>Cl<sub>2</sub>).

**FTIR** (neat): 1720, 1452, 1315, 1264, 1212, 1175, 1109, 1070, 1039, 1026, 970, 734, 705 cm<sup>-1</sup>.

**HRMS** (CI) Calcd. for C<sub>22</sub>H<sub>23</sub>O<sub>4</sub> [M+H]<sup>+</sup>: 351.1596, Found: 351.1599.



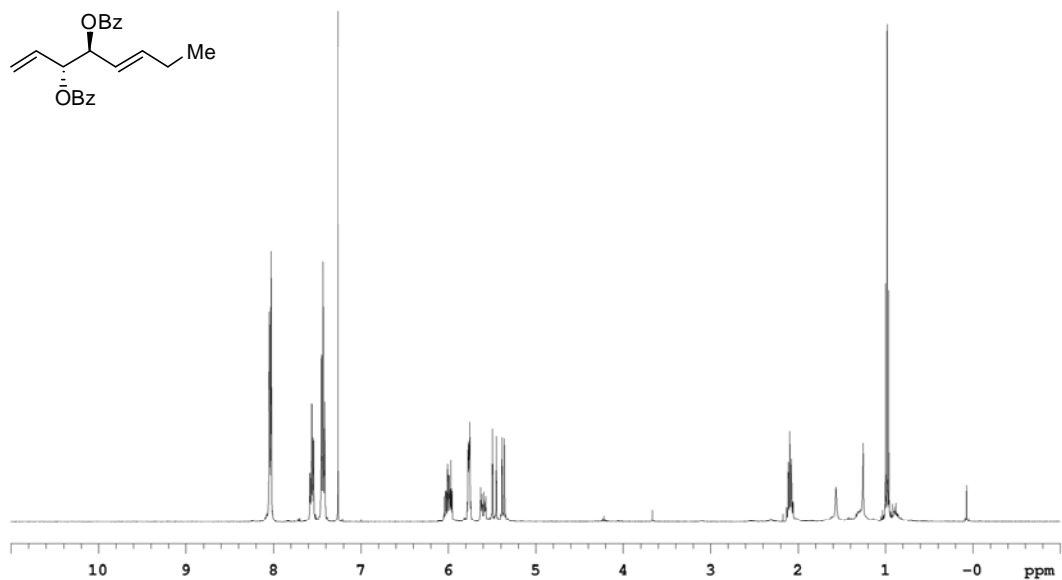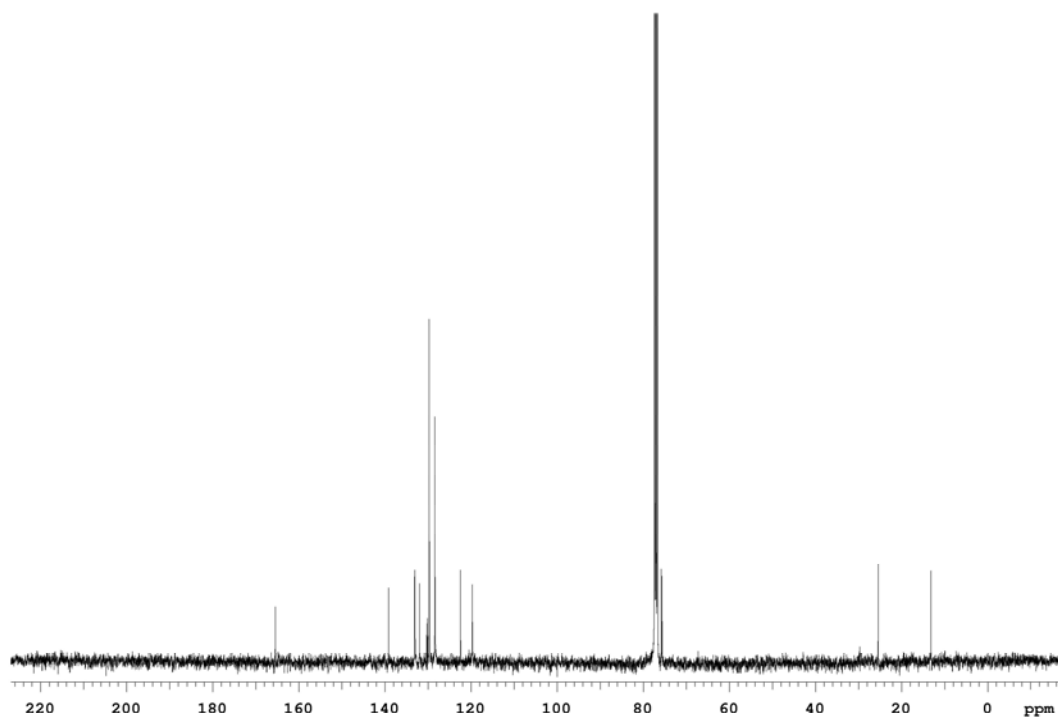

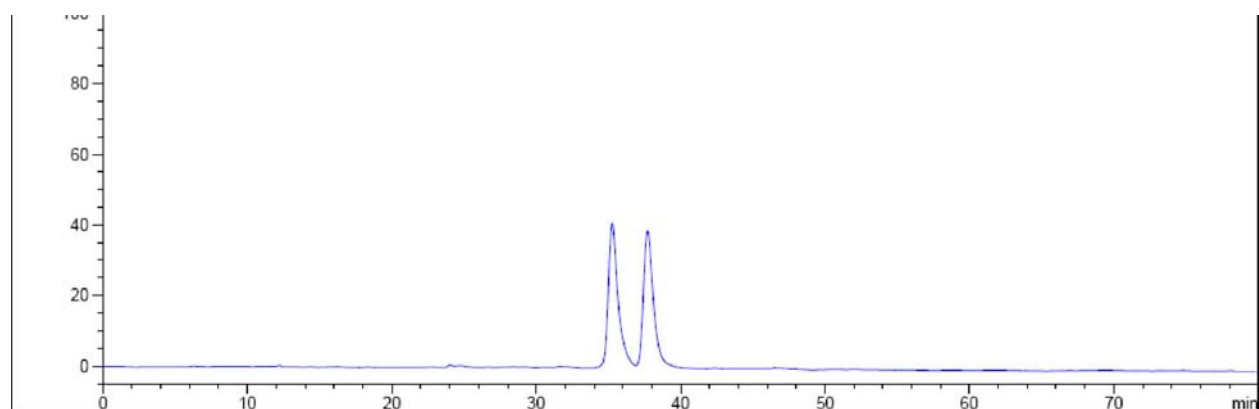

| Peak # | RetTime [min] | Type | Width [min] | Area [mAU*s] | Height [mAU] | Area %  |
|--------|---------------|------|-------------|--------------|--------------|---------|
| 1      | 35.253        | BV   | 0.7162      | 1991.99500   | 41.19455     | 50.5255 |
| 2      | 37.692        | VV   | 0.7500      | 1950.56238   | 39.10119     | 49.4745 |

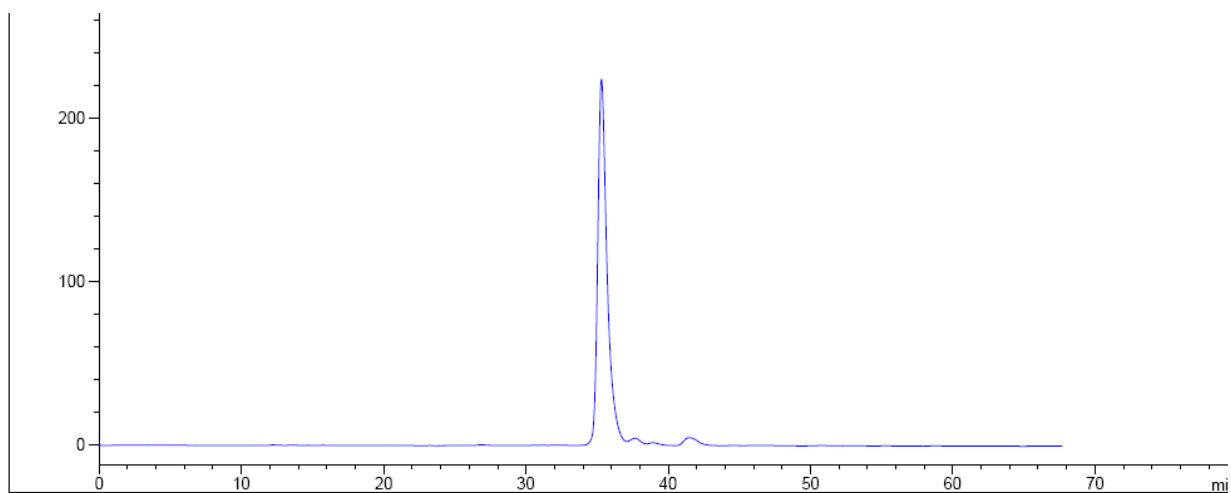

| Peak # | RetTime [min] | Type | Width [min] | Area [mAU*s] | Height [mAU] | Area %  |
|--------|---------------|------|-------------|--------------|--------------|---------|
| 1      | 35.294        | BB   | 0.6723      | 1.00818e4    | 222.64949    | 99.2252 |
| 2      | 37.648        | BB   | 0.4330      | 78.72734     | 2.33729      | 0.7748  |

**(3*R*, 4*S*)-7-(tert-butyldimethylsilyloxy)hept-1-ene-3,4-diyl dibenzoate**

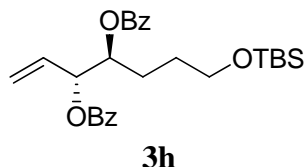

An oven-dried sealed tube under one atmosphere of nitrogen gas was charged with (*R*)-*SEGP*HOS-**I** (10.3 mg, 0.01 mmol, 5 mol%) and THF (1.0 M, 0.2 mL). 4-(*tert*-butyldimethylsilyloxy)butanal **2h** (40 mg, 0.2 mmol, 100 mol%), acrolein *gem*-dibenzoate **1e** (113 mg, 0.4 mmol, 200 mol%), anhydrous K<sub>3</sub>PO<sub>4</sub> (43 mg, 0.2 mmol, 100 mol%) and isopropanol (24 mg, 0.4 mmol, 200 mol%) were added and the reaction mixture was allowed to stir at 60 °C for 48 hr, at which point the reaction mixture was cooled to ambient temperature. Benzoyl chloride (116 μL, 1.0 mmol, 500 mol%), Et<sub>3</sub>N (270 μL, 2.0 mmol, 1000 mol%), DMAP (1.2 mg, 0.01 mmol, 5 mol%) and CH<sub>2</sub>Cl<sub>2</sub> (0.6 mL) were added. The reaction mixture was allowed to stir at ambient temperature for 20 hr, at which point the reaction mixture was quenched with aqueous NH<sub>4</sub>Cl (3 mL) and extracted with CH<sub>2</sub>Cl<sub>2</sub>. The organic layer was dried (MgSO<sub>4</sub>), filtered and concentrated *in vacuo*. Purification of the residue by column chromatography (SiO<sub>2</sub>; ethyl acetate:hexanes, 1:20) provided **3h** (66 mg, 0.14 mmol) as a colorless oil in 70% yield (12:1 dr).

**<sup>1</sup>H NMR** (400 MHz, CDCl<sub>3</sub>): δ 8.04-8.00 (m, 4H), 7.58-7.53 (m, 2H), 7.45-7.39 (m, 4H), 6.05-5.97 (m, 1H), 5.75-5.72 (m, 1H), 5.50-5.45 (m, 2H), 5.37 (dt, *J* = 10.4, 1.2 Hz, 1H), 3.69-3.59 (m, 2H), 1.93-1.86 (m, 2H), 1.66-1.56 (m, 2H), 0.87 (s, 9H), 0.02 (s, 6H).

**<sup>13</sup>C NMR** (100 MHz, CDCl<sub>3</sub>): δ 166.0, 165.4, 133.0, 132.0, 130.1, 129.7, 128.4, 119.7, 75.9, 74.3, 62.4, 28.6, 26.3, 25.9, 18.3, -5.3.

**HPLC**: (Chiralcel AD-H + AD-H columns, hexanes:*i*-PrOH = 99.5:0.5, 0.3 mL/min, 230 nm), *t*<sub>major</sub> = 43.9 min, *t*<sub>minor</sub> = 51.9 min; ee = 94%.

[α]<sub>D</sub><sup>25</sup> = +6.93 (c = 2.02, CH<sub>2</sub>Cl<sub>2</sub>).

**FTIR** (neat): 1717, 1451, 1315, 1273, 1247, 1177, 1097, 1059, 1024, 949, 834, 776, 737, 708, 687 cm<sup>-1</sup>.

**HRMS** (CI) Calcd. for C<sub>27</sub>H<sub>37</sub>O<sub>5</sub>Si [M+H]<sup>+</sup>: 469.2410, Found: 469.2419.

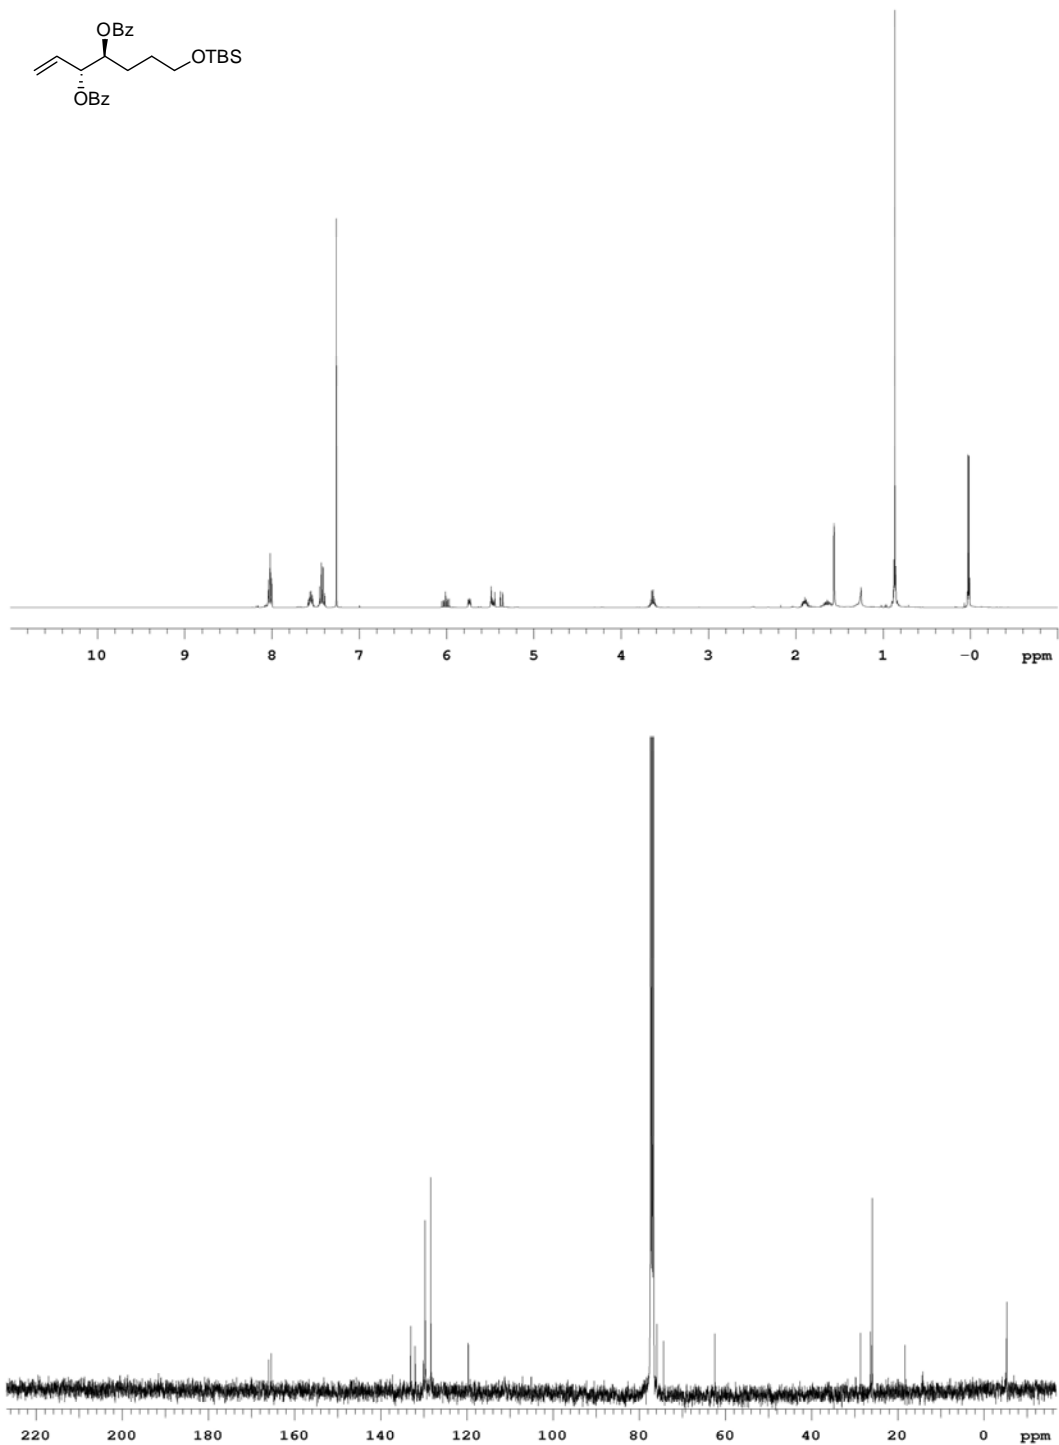

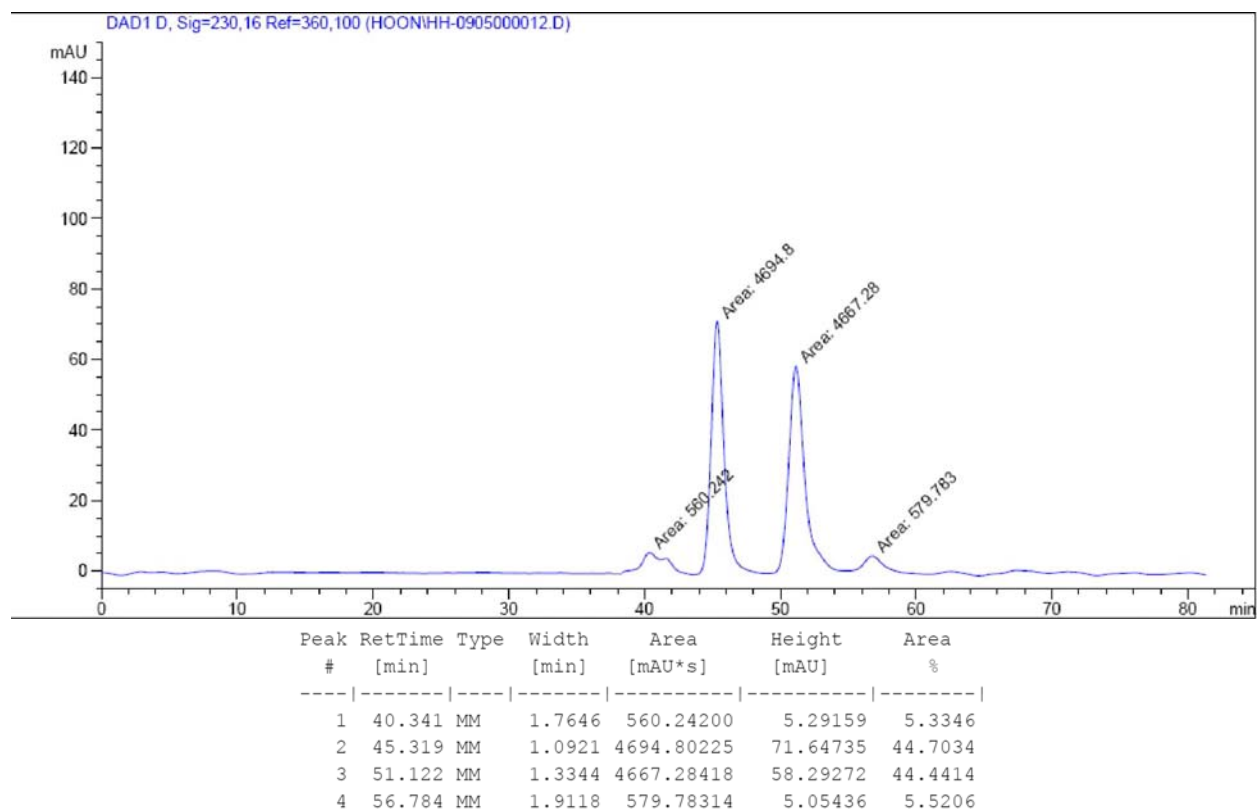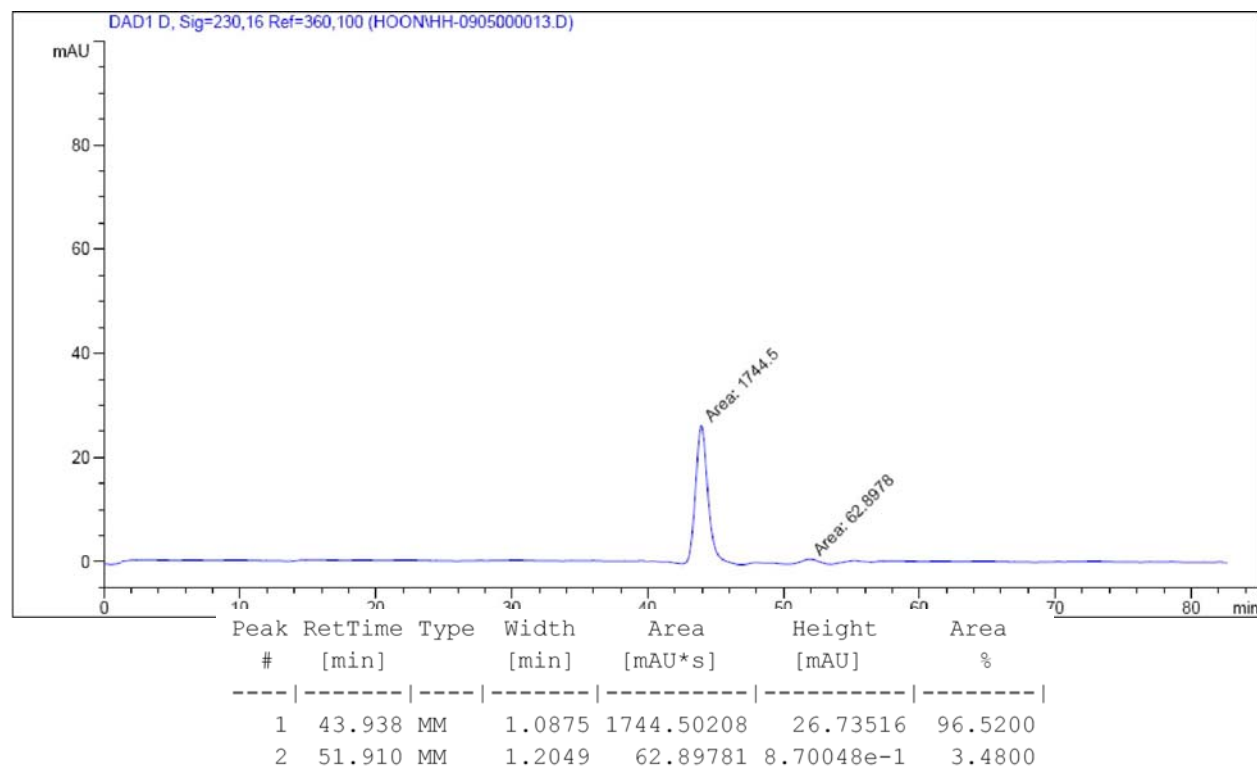

**(3*R*, 4*S*)-dodec-1-ene-3, 4-diyl dibenzoate**

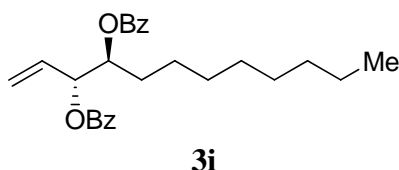

An oven-dried sealed tube under one atmosphere of nitrogen gas was charged with (*R*)-*SEGP*HOS-**I** (10.3 mg, 0.01 mmol, 5 mol%) and THF (1.0 M, 0.2 mL). Nonanal **2i** (28 mg, 0.2 mmol, 100 mol%), acrolein *gem*-dibenzoate **1e** (113 mg, 0.4 mmol, 200 mol%), anhydrous K<sub>3</sub>PO<sub>4</sub> (43 mg, 0.2 mmol, 100 mol%) and isopropanol (24 mg, 0.4 mmol, 200 mol%) were added and the reaction mixture was allowed to stir at 60 °C for 48 hr, at which point the reaction mixture was cooled to ambient temperature. Benzoyl chloride (116 μL, 1.0 mmol, 500 mol%), Et<sub>3</sub>N (270 μL, 2.0 mmol, 1000 mol%), DMAP (1.2 mg, 0.01 mmol, 5 mol%) and CH<sub>2</sub>Cl<sub>2</sub> (0.6 mL) were added. The reaction mixture was allowed to stir at ambient temperature for 20 hr, at which point the reaction mixture was quenched with aqueous NH<sub>4</sub>Cl (3 mL) and extracted with CH<sub>2</sub>Cl<sub>2</sub>. The organic layer was dried (MgSO<sub>4</sub>), filtered and concentrated *in vacuo*. Purification of the residue by column chromatography (SiO<sub>2</sub>; ethyl acetate:hexanes, 1:20) provided **3i** (58 mg, 0.142 mmol) as a colorless oil in 71% yield (13:1 dr).

**<sup>1</sup>H NMR** (400 MHz, CDCl<sub>3</sub>): δ 8.05-8.00 (m, 4H), 7.59-7.53 (m, 2H), 7.47-7.40 (m, 4H), 6.07-5.98 (m, 1H), 5.73-5.70 (m, 1H), 5.49-5.45 (m, 2H), 5.37 (dt, *J* = 10.4, 1.2 Hz, 1H), 1.84-1.74 (m, 2H), 1.45-1.24 (m, 12H), 0.86 (t, *J* = 7.2 Hz, 3H)

**<sup>13</sup>C NMR** (100 MHz, CDCl<sub>3</sub>): δ 166.0, 165.4, 133.0, 132.9, 132.0, 130.2, 130.1, 130.0, 128.4, 119.7, 75.9, 74.5, 31.8, 30.0, 29.4, 29.3, 29.2, 25.4, 22.6, 14.1.

**HPLC**: (Chiralcel AD-H + OD-H columns, hexanes:*i*-PrOH = 99:1, 0.3 mL/min, 230 nm), *t*<sub>major</sub> = 39.3 min, *t*<sub>minor</sub> = 42.4 min; ee = 97%.

[α]<sub>D</sub><sup>25</sup> = +8.47 (c = 1.77, CH<sub>2</sub>Cl<sub>2</sub>).

**FTIR** (neat): 1721, 1602, 1452, 1315, 1264, 1177, 1108, 1080, 1060, 1024, 949, 802, 736, 708, 687 cm<sup>-1</sup>.

**HRMS** (CI) Calcd. for C<sub>26</sub>H<sub>33</sub>O<sub>4</sub> [M+H]<sup>+</sup>: 409.2379, Found: 409.2379.

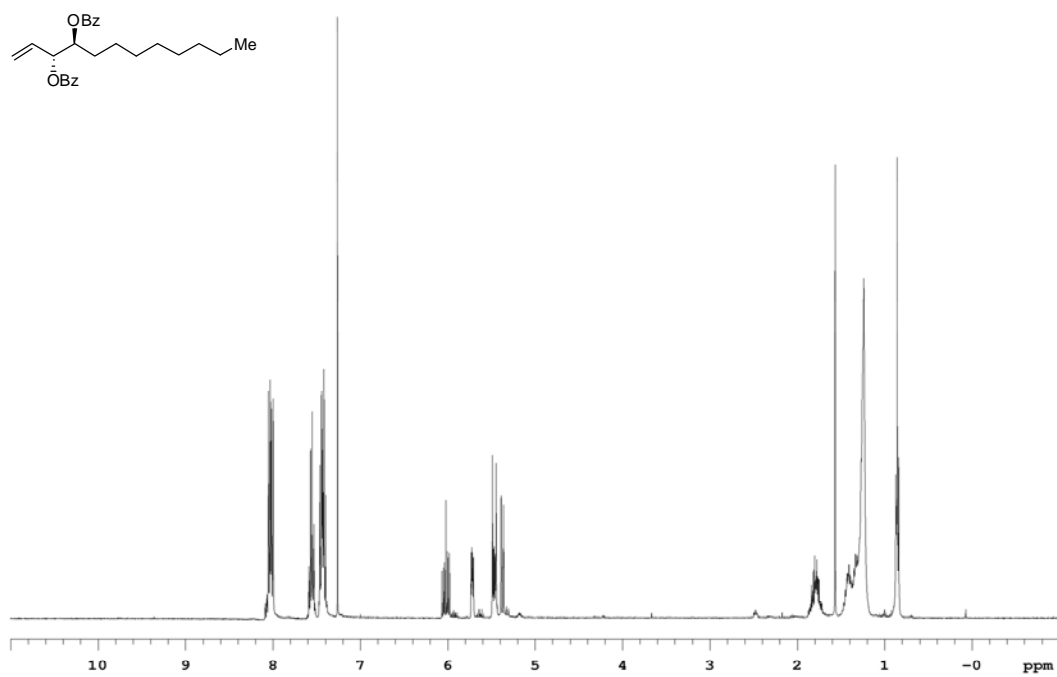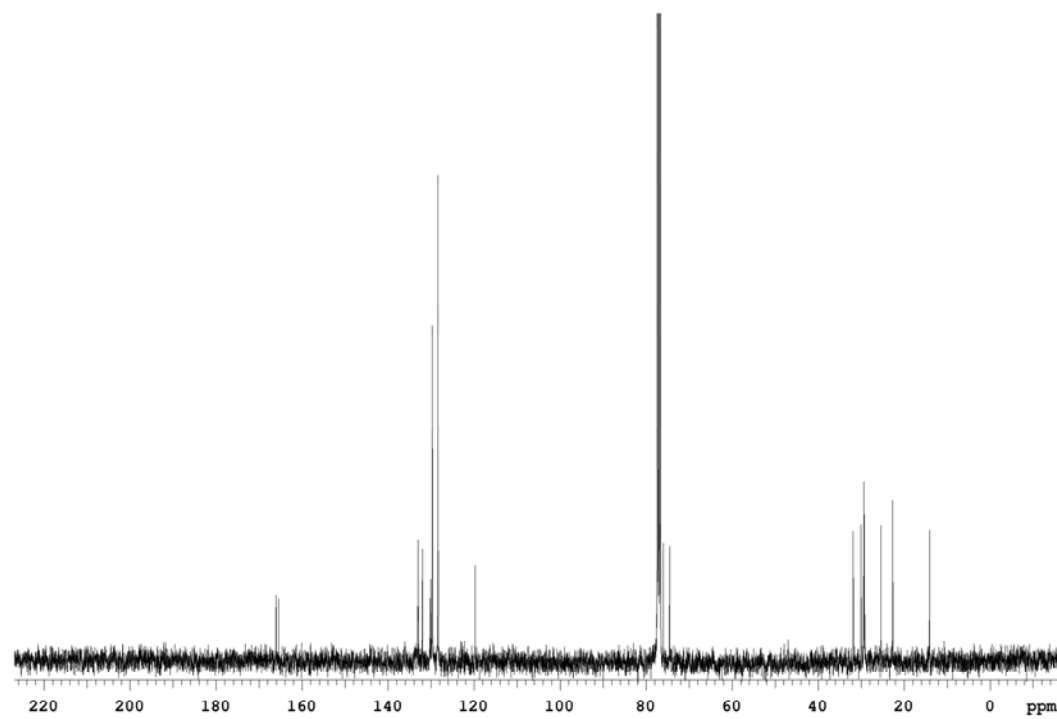

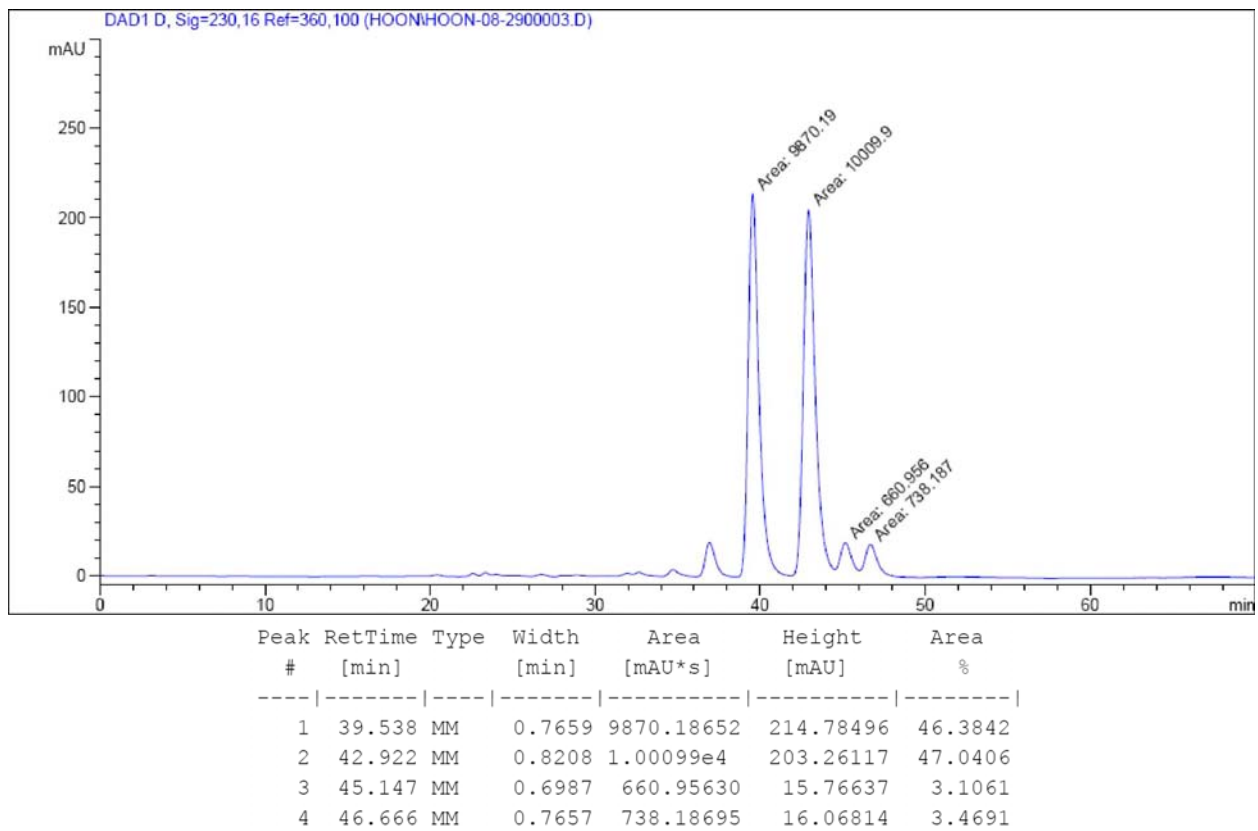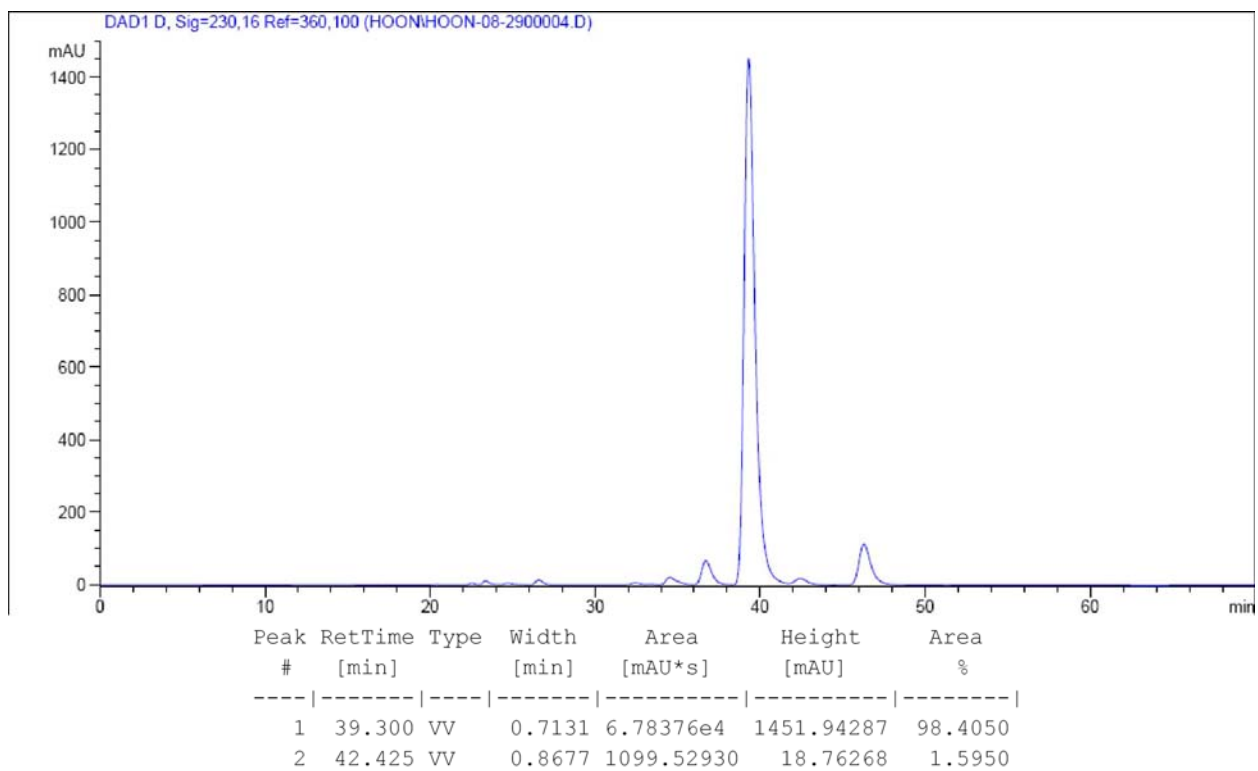



**(1*S*,2*R*)-1-phenylbut-3-ene-1, 2-diol<sup>3</sup>**

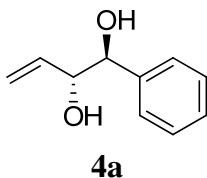

An oven-dried sealed tube under one atmosphere of nitrogen gas was charged with (*R*)-*SEGP*HOS-**I** (10.3 mg, 0.01 mmol, 5 mol%) and THF (1.0 M, 0.2 mL). Benzaldehyde **2a** (21 mg, 0.2 mmol, 100 mol%), acrolein *gem*-dibenzoate **1e** (113 mg, 0.4 mmol, 200 mol%), anhydrous K<sub>3</sub>PO<sub>4</sub> (43 mg, 0.2 mmol, 100 mol%) and isopropanol (24 mg, 0.4 mmol, 200 mol%) were added and the reaction mixture was allowed to stir at 60 °C for 48 hr, at which point the reaction mixture was cooled to ambient temperature. K<sub>2</sub>CO<sub>3</sub> (55 mg, 0.4 mmol, 200 mol%) and MeOH (2.0 mL) were added. The reaction mixture was allowed to stir at ambient temperature for 18 hr, at which point the reaction mixture was quenched with aqueous NH<sub>4</sub>Cl (3 mL) and extracted with ethyl acetate. The organic layer was dried (MgSO<sub>4</sub>), filtered and concentrated *in vacuo*. Purification of the residue by column chromatography (SiO<sub>2</sub>; ethyl acetate:hexanes, 1:10) provided **4a** (25 mg, 0.154 mmol) as a colorless oil in 77% yield (17:1 dr).

**<sup>1</sup>H NMR** (400 MHz, CDCl<sub>3</sub>): δ 7.37-7.30 (m, 5H), 5.89-5.74 (m, 1H), 5.38-5.22 (m, 2H), 4.77 (d, *J* = 4.4 Hz, 1H), 4.35-4.31 (m, 1H), 2.46 (br, 1H), 2.08 (br, 1H).

**<sup>13</sup>C NMR** (100 MHz, CDCl<sub>3</sub>): δ 139.7, 135.8, 128.3, 127.9, 126.6, 117.9, 76.5 (two carbons overlap).

**GC**: (Cyclosil-B: initial temperature: 100 °C (5 min hold), final temperature: 220 °C (2 min hold), rate: 2 °C/min): *t*<sub>major</sub> = 37.2 min, *t*<sub>minor</sub> = 37.5 min; ee = 99%.

[α]<sub>D</sub><sup>25</sup> = +71.0 (*c* = 0.91, CHCl<sub>3</sub>). To corroborate the assignment of absolute stereochemistry, the optical rotation was correlated with a known compound.<sup>3</sup>

**FTIR** (neat): 3388, 2920, 1494, 1452, 1427, 1197, 1122, 1091, 1063, 1028, 995, 927, 863, 830, 763, 724, 700 cm<sup>-1</sup>.

**HRMS** (CI) Calcd. for C<sub>10</sub>H<sub>11</sub>O<sub>2</sub> [M-H]<sup>+</sup>: 163.0759, Found: 163.0757.

<sup>3</sup> Lombard, M.; Licciulli, S.; Trombini, C. *Tetrahedron: Asymmetry* **1988**, 9, 293.

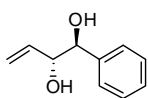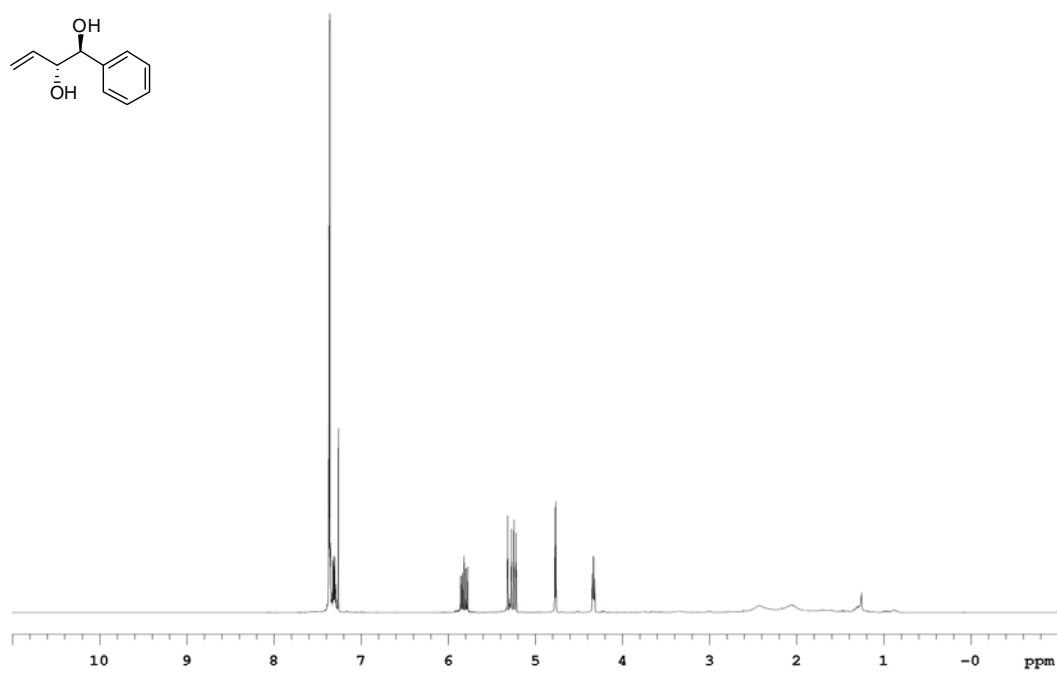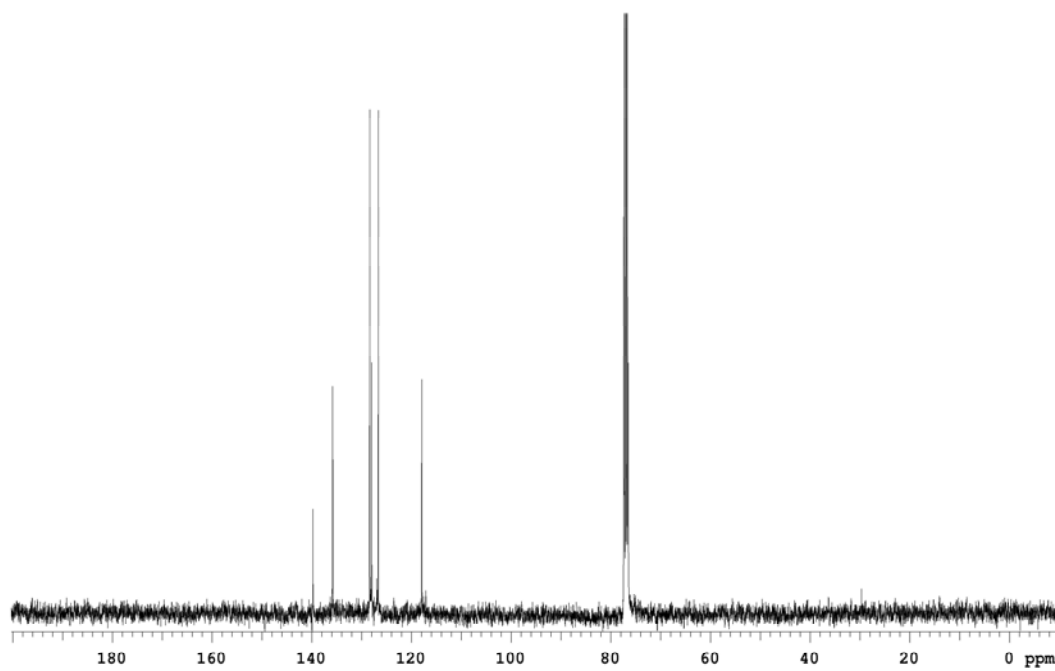

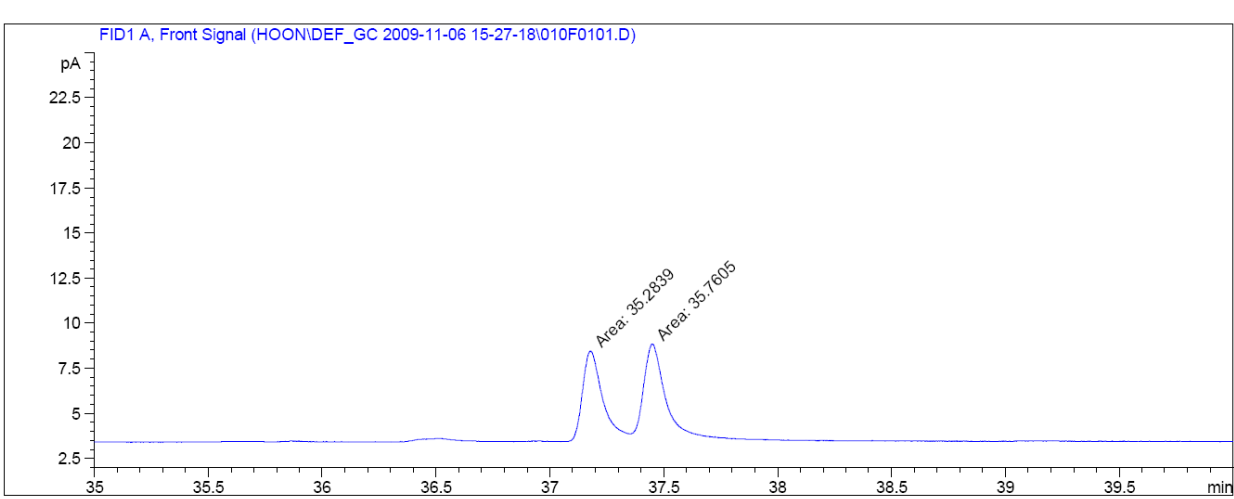

| Peak # | RetTime [min] | Type | Width [min] | Area [pA*s] | Height [pA] | Area %   |
|--------|---------------|------|-------------|-------------|-------------|----------|
| 1      | 37.180        | MM   | 0.1134      | 35.28388    | 5.18569     | 49.66456 |
| 2      | 37.451        | MM   | 0.1068      | 35.76049    | 5.58143     | 50.33544 |

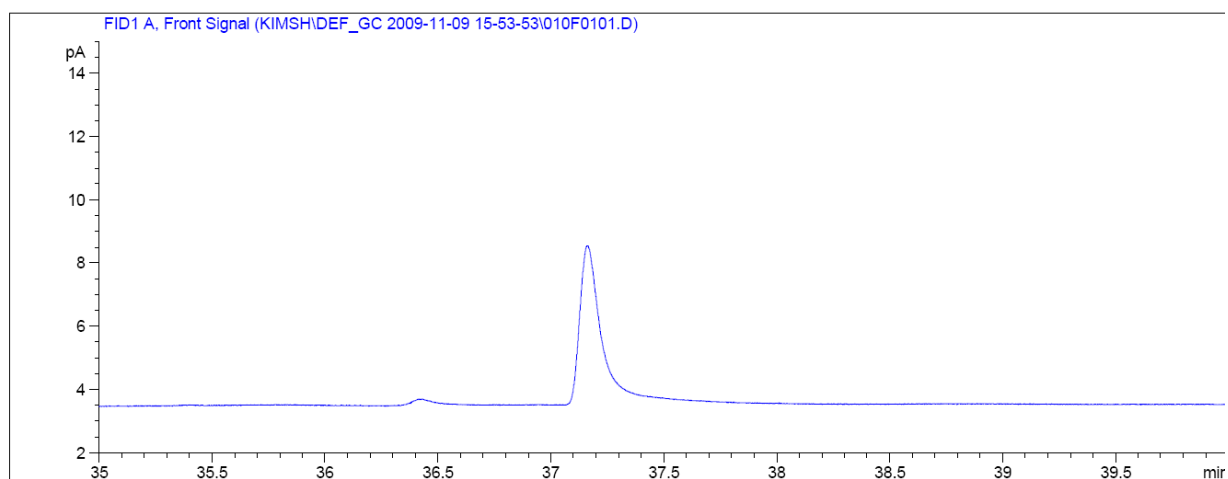

| Peak # | RetTime [min] | Type | Width [min] | Area [pA*s] | Height [pA] | Area %  |
|--------|---------------|------|-------------|-------------|-------------|---------|
| 1      | 37.164        | MM   | 0.1189      | 36.23504    | 5.08130     | 1.000e2 |

**(1*S*, 2*R*)-1-(6-bromopyridin-2-yl)but-3-ene-1, 2-diol**

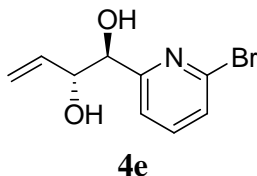

An oven-dried sealed tube under one atmosphere of nitrogen gas was charged with (*R*)-*SEGP*HOS-**I** (10.3 mg, 0.01 mmol, 5 mol%) and THF (1.0 M, 0.2 mL). 6-Bromopyridine-2-carboxaldehyde **2e** (37 mg, 0.2 mmol, 100 mol%), acrolein *gem*-dibenzoate **1e** (113 mg, 0.4 mmol, 200 mol%), anhydrous K<sub>3</sub>PO<sub>4</sub> (43 mg, 0.2 mmol, 100 mol%) and isopropanol (24 mg, 0.4 mmol, 200 mol%) were added and the reaction mixture was allowed to stir at 60 °C for 48 hr, at which point the reaction mixture was cooled to ambient temperature. K<sub>2</sub>CO<sub>3</sub> (55 mg, 0.4 mmol, 200 mol%) and MeOH (2.0 mL) were added. The reaction mixture was allowed to stir at ambient temperature for 18 hr, at which point the reaction mixture was quenched with aqueous NH<sub>4</sub>Cl (3 mL) and extracted with ethyl acetate. The organic layer was dried (MgSO<sub>4</sub>), filtered and concentrated *in vacuo*. Purification of the residue by column chromatography (SiO<sub>2</sub>; ethyl acetate:hexanes, 1:10) provided **4e** (30 mg, 0.124 mmol) as a colorless oil in 62% yield (7:1 dr).

**<sup>1</sup>H NMR** (400 MHz, CDCl<sub>3</sub>): δ 7.58-7.55 (m, 1H), 7.44-7.41 (m, 1H), 7.36-7.33 (m, 1H), 5.84-5.76 (m, 1H), 5.29 (dt, *J* = 17.6, 1.6 Hz, 1H), 5.22 (dt, *J* = 10.8, 1.6 Hz, 1H), 4.74 (d, *J* = 4.8 Hz, 1H), 4.45-4.23 (m, 1H), 3.57 (br, 1H), 2.87 (br, 1H).

**<sup>13</sup>C NMR** (100 MHz, CDCl<sub>3</sub>): δ 160.4, 140.9, 139.0, 135.7, 127.2, 120.6, 117.9, 76.1, 74.8.

**GC**: (Cyclosil-B: initial temperature: 120 °C (10 min hold), final temperature: 180 °C (5min hold), rate: 1.5 °C/min): *t*<sub>minor</sub> = 47.7 min, *t*<sub>major</sub> = 48.2 min; ee = 96%.

[α]<sub>D</sub><sup>25</sup> = +20.8 (c = 0.90, CH<sub>2</sub>Cl<sub>2</sub>).

**FTIR** (neat): 2304, 1557, 1440, 1265, 896, 733, 704 cm<sup>-1</sup>.

**HRMS** (CI) Calcd. for C<sub>9</sub>H<sub>11</sub>NO<sub>2</sub>Br [M+H]<sup>+</sup>: 243.9973, Found: 243.9975.

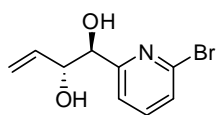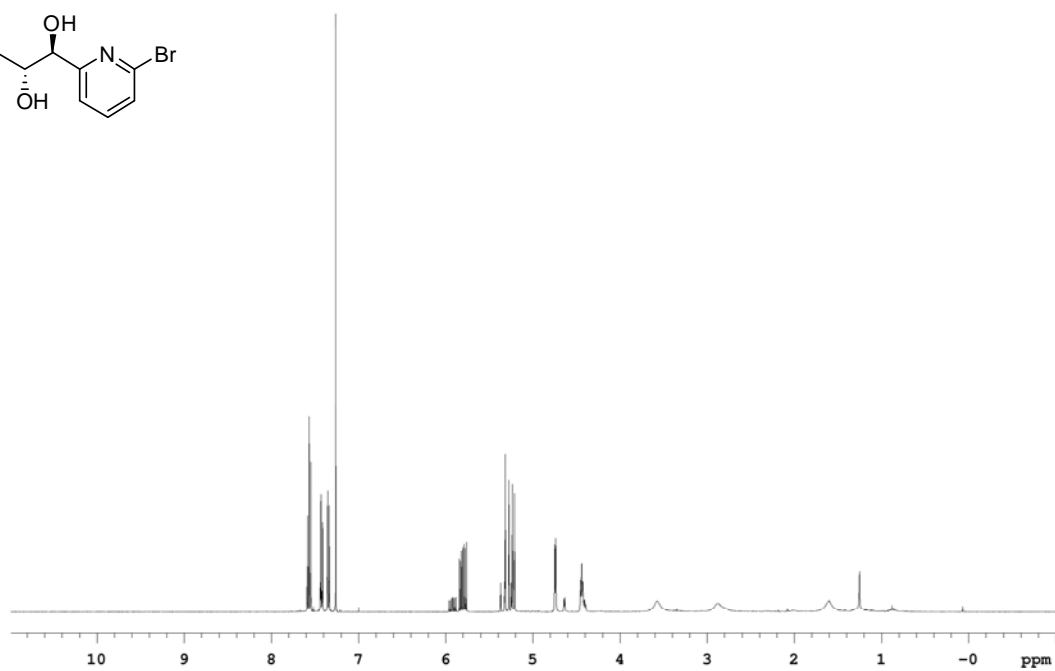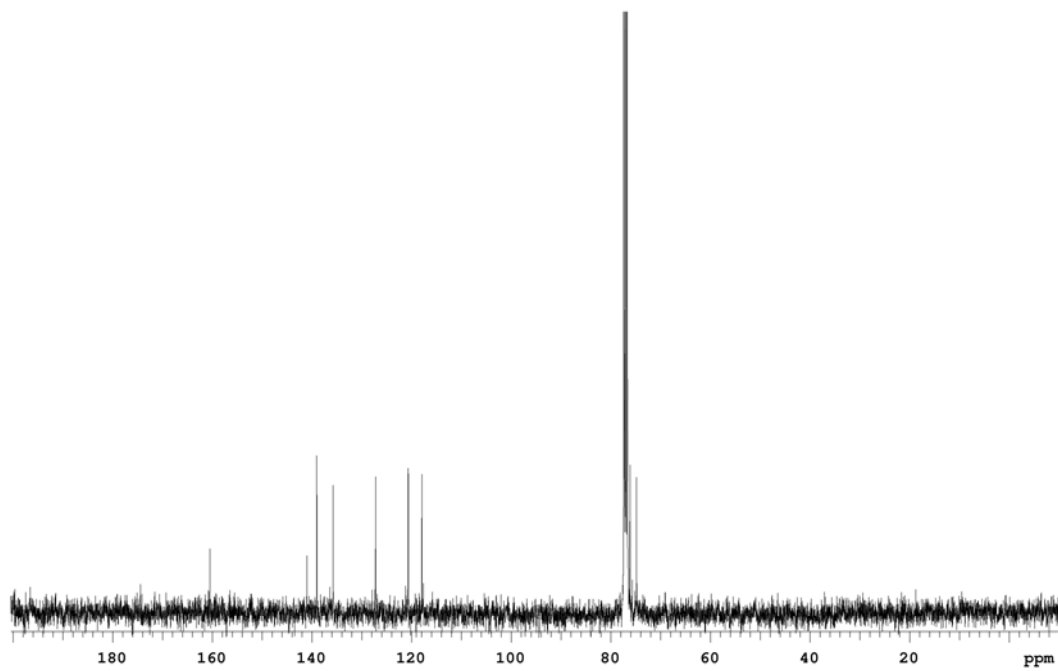

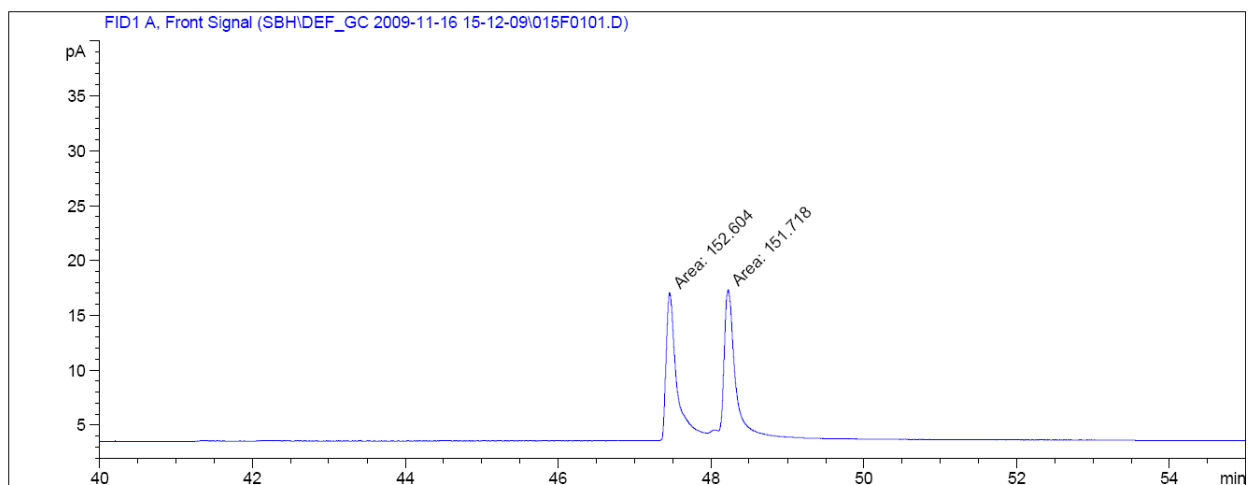

| Peak # | RetTime [min] | Type | Width [min] | Area [pA*s] | Height [pA] | Area %   |
|--------|---------------|------|-------------|-------------|-------------|----------|
| 1      | 47.458        | MM   | 0.1846      | 152.60362   | 13.77697    | 50.14550 |
| 2      | 48.223        | MM   | 0.1805      | 151.71806   | 14.00641    | 49.85450 |

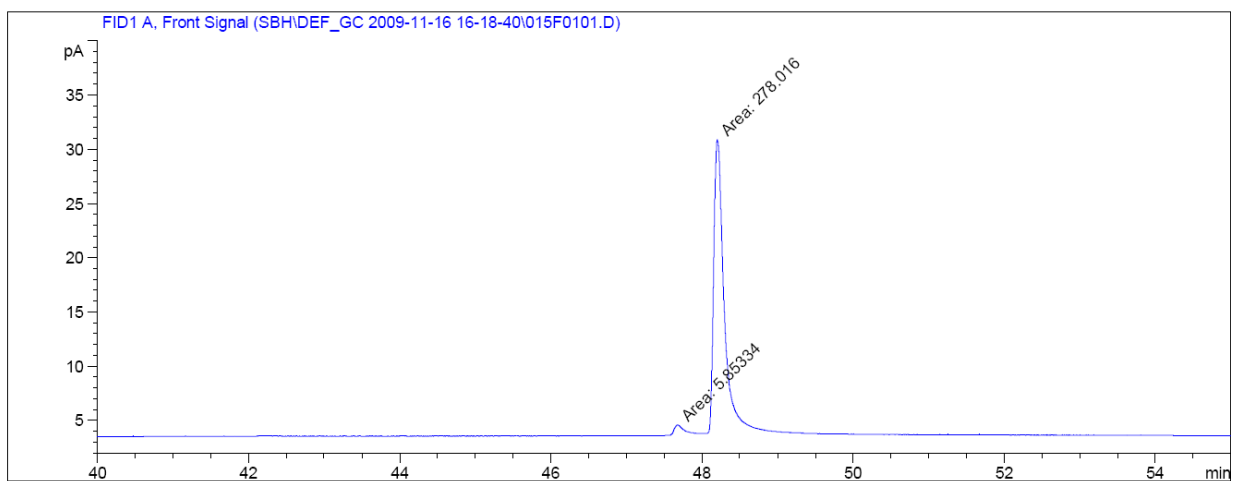

| Peak # | RetTime [min] | Type | Width [min] | Area [pA*s] | Height [pA] | Area %   |
|--------|---------------|------|-------------|-------------|-------------|----------|
| 1      | 47.676        | MM   | 0.1165      | 5.85334     | 8.37402e-1  | 2.06199  |
| 2      | 48.202        | MM   | 0.1702      | 278.01581   | 27.21951    | 97.93801 |

**(3*S*, 4*R*, *E*)-1-phenylhexa-1,5-diene-3, 4-diol**

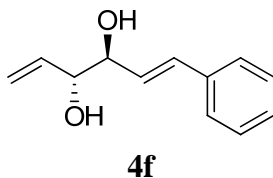

An oven-dried sealed tube under one atmosphere of nitrogen gas was charged with (*R*)-*SEGP*HOS-**I** (10.3 mg, 0.01 mmol, 5 mol%) and THF (1.0 M, 0.2 mL). Cinnamaldehyde **2f** (26 mg, 0.2 mmol, 100 mol%), acrolein *gem*-dibenzoate **1e** (113 mg, 0.4 mmol, 200 mol%), anhydrous K<sub>3</sub>PO<sub>4</sub> (43 mg, 0.2 mmol, 100 mol%) and isopropanol (24 mg, 0.4 mmol, 200 mol%) were added and the reaction mixture was allowed to stir at 60 °C for 48 hr, at which point the reaction mixture was cooled to ambient temperature. K<sub>2</sub>CO<sub>3</sub> (55 mg, 0.4 mmol, 200 mol%) and MeOH (2.0 mL) were added. The reaction mixture was allowed to stir at ambient temperature for 18 hr, at which point the reaction mixture was quenched with aqueous NH<sub>4</sub>Cl (3 mL) and extracted with ethyl acetate. The organic layer was dried (MgSO<sub>4</sub>), filtered and concentrated *in vacuo*. Purification of the residue by column chromatography (SiO<sub>2</sub>; ethyl acetate:hexanes, 1:10) provided **4f** (26 mg, 0.136 mmol) as a colorless oil in 68% yield (18:1 dr).

**<sup>1</sup>H NMR** (400 MHz, CDCl<sub>3</sub>): δ 7.33-7.16 (m, 5H), 6.60 (dd, *J* = 16.0, 0.8 Hz, 1H), 6.17 (dd, *J* = 16.0, 6.4 Hz, 1H), 5.90-5.82 (m, 1H), 5.31 (dd, *J* = 17.2, 1.6 Hz, 1H), 5.22 (dd, *J* = 10.4, 1.2 Hz, 1H), 4.32-4.20 (m, 2H), 2.19 (br, 2H).

**<sup>13</sup>C NMR** (100 MHz, CDCl<sub>3</sub>): δ 136.3, 136.0, 132.8, 128.6, 127.9, 126.9, 126.6, 117.7, 75.7, 75.3.

**GC**: (Cyclosil-B: initial temperature: 100 °C (5 min hold), final temperature: 200 °C (5 min hold), rate: 2.5 °C/min): *t*<sub>major</sub> = 41.0 min, *t*<sub>minor</sub> = 41.3 min; ee = 97%.

[α]<sub>D</sub><sup>25</sup> = +15.4 (*c* = 0.80, CH<sub>2</sub>Cl<sub>2</sub>).

**FTIR** (neat): 3388, 1699, 1494, 1450, 1265, 1026, 993, 969, 931, 734, 702 cm<sup>-1</sup>.

**HRMS** (CI) Calcd. for C<sub>12</sub>H<sub>15</sub>O<sub>2</sub> [M+H]<sup>+</sup>: 191.1072, Found: 191.1074.

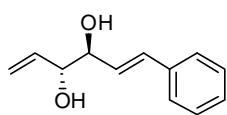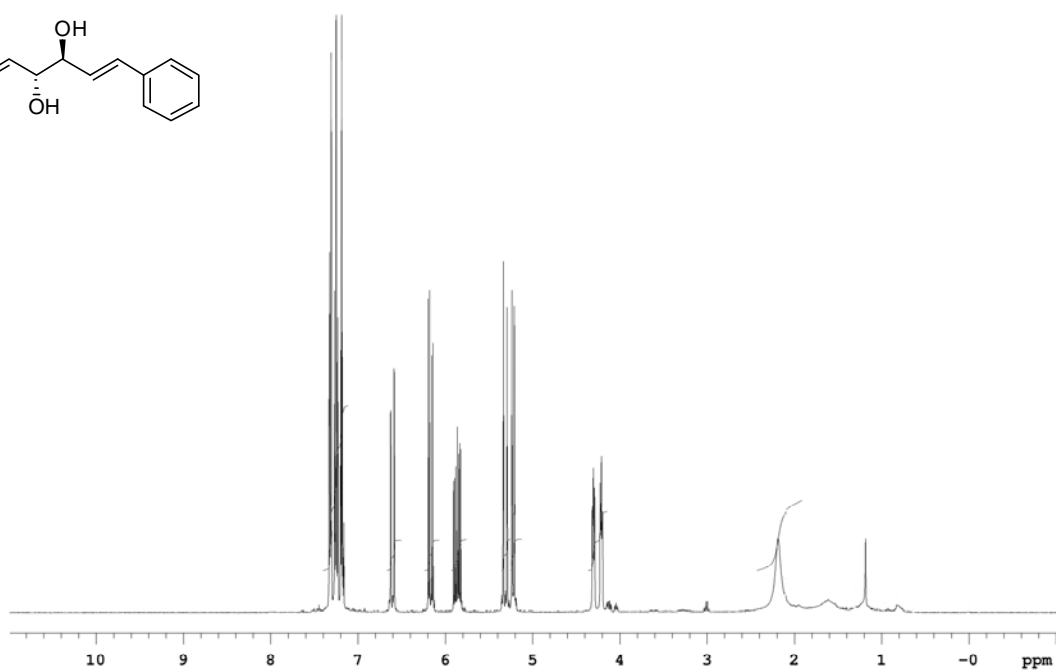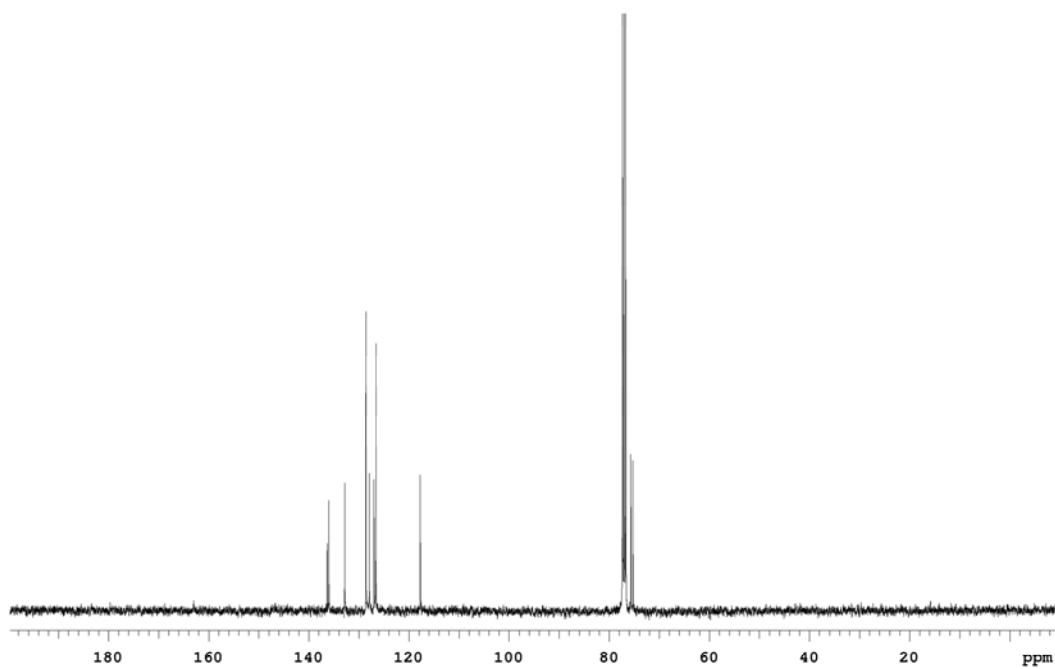



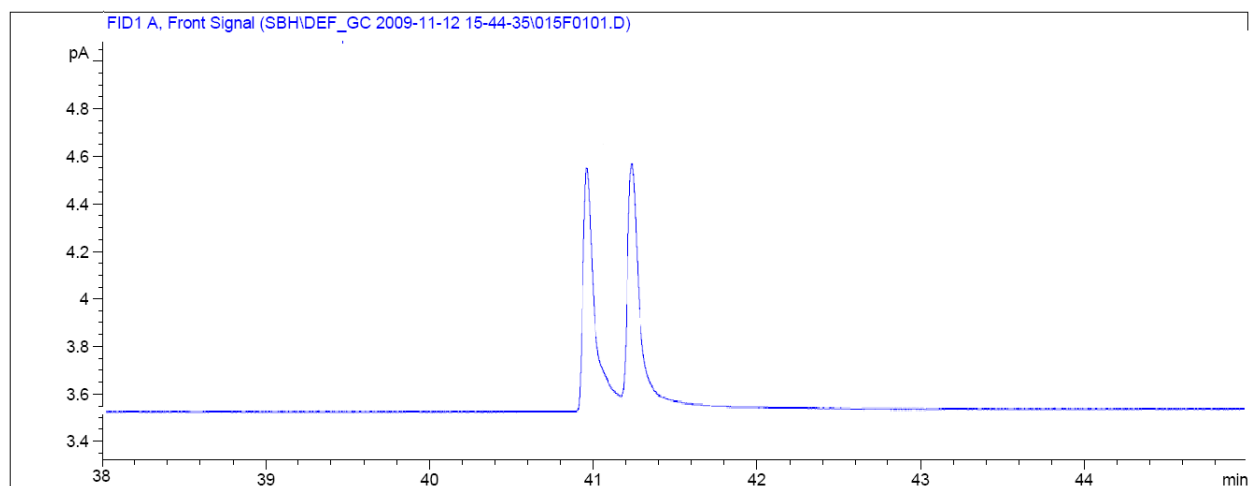

| Peak # | RetTime [min] | Type | Width [min] | Area [pA*s] | Height [pA] | Area %   |
|--------|---------------|------|-------------|-------------|-------------|----------|
| 1      | 41.003        | MM   | 0.1484      | 3.65168     | 4.10106e-1  | 50.36076 |
| 2      | 41.249        | MM   | 0.1169      | 3.59936     | 5.13012e-1  | 49.63924 |

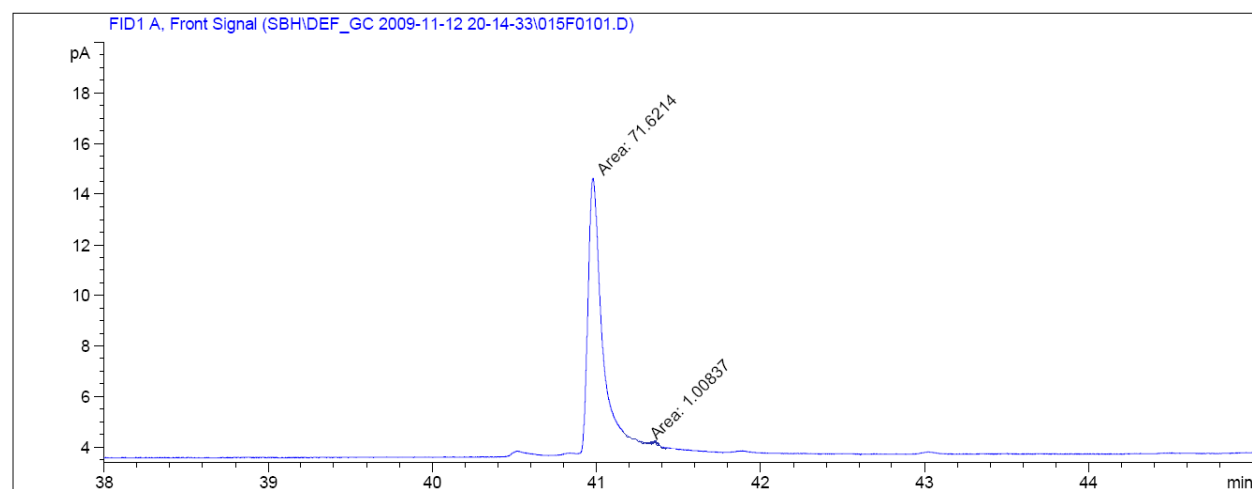

| Peak # | RetTime [min] | Type | Width [min] | Area [pA*s] | Height [pA] | Area %   |
|--------|---------------|------|-------------|-------------|-------------|----------|
| 1      | 40.978        | MM   | 0.1085      | 71.62141    | 11.00668    | 98.61163 |
| 2      | 41.304        | MM   | 0.0279      | 1.00837     | 6.02053e-1  | 1.38837  |

**(3*R*, 4*S*)-dodec-1-ene-3,4-diol**

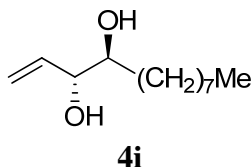

An oven-dried sealed tube under one atmosphere of nitrogen gas was charged with (*R*)-*SEGP*HOS-**I** (10.3 mg, 0.01 mmol, 5 mol%) and THF (1.0 M, 0.2 mL). Nonanal **2i** (28 mg, 0.2 mmol, 100 mol%), acrolein *gem*-dibenzoate **1e** (113 mg, 0.4 mmol, 200 mol%), anhydrous K<sub>3</sub>PO<sub>4</sub> (43 mg, 0.2 mmol, 100 mol%) and isopropanol (24 mg, 0.4 mmol, 200 mol%) were added and the reaction mixture was allowed to stir at 60 °C for 48 hr, at which point the reaction mixture was cooled to ambient temperature. K<sub>2</sub>CO<sub>3</sub> (55 mg, 0.4 mmol, 200 mol%) and MeOH (2.0 mL) were added. The reaction mixture was allowed to stir at ambient temperature for 18 hr, at which point the reaction mixture was quenched with aqueous NH<sub>4</sub>Cl (3 mL) and extracted with ethyl acetate. The organic layer was dried (MgSO<sub>4</sub>), filtered and concentrated *in vacuo*. Purification of the residue by column chromatography (SiO<sub>2</sub>; ethyl acetate:hexanes, 1:10) provided **4i** (28 mg, 0.14 mmol) as a colorless oil in 70% yield (14:1 dr).

**<sup>1</sup>H NMR** (400 MHz, CDCl<sub>3</sub>): δ 5.97-5.89 (m, 1H), 5.37-5.27 (m, 2H), 4.12-4.09 (m, 1H), 3.72-3.68 (m, 1H), 1.50-1.24 (m, 14H), 0.88 (t, *J* = 7.2 Hz, 3H).

**<sup>13</sup>C NMR** (100 MHz, CDCl<sub>3</sub>): δ 135.7, 117.4, 75.6, 73.7, 31.8, 31.5, 29.3, 29.2, 28.9, 25.5, 22.3, 13.8.

**GC**: (Cyclosil-B: initial temperature: 150 °C (5 min hold), final temperature: 200 °C (5 min hold), rate: 2.0 °C/min): *t*<sub>major</sub> = 12.5 min, *t*<sub>minor</sub> = 12.8 min; ee = 99%.

[α]<sub>D</sub><sup>25</sup> = +7.9 (*c* = 0.65, CH<sub>2</sub>Cl<sub>2</sub>).

**FTIR** (neat): 3298, 2953, 2917, 2851, 1705, 1467, 1378, 1317, 1264, 1118, 1072, 1028, 1006, 926, 737, 711 cm<sup>-1</sup>.

**HRMS** (CI) Calcd. for C<sub>10</sub>H<sub>11</sub>O<sub>2</sub> [M-H]<sup>+</sup>: 199.1698, Found: 199.1695.

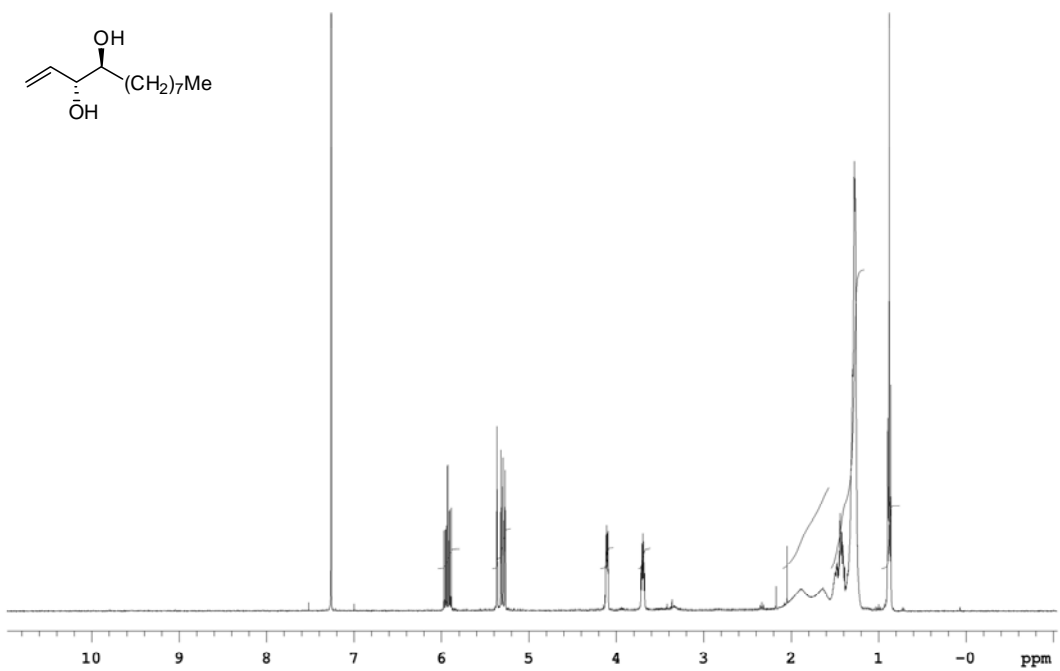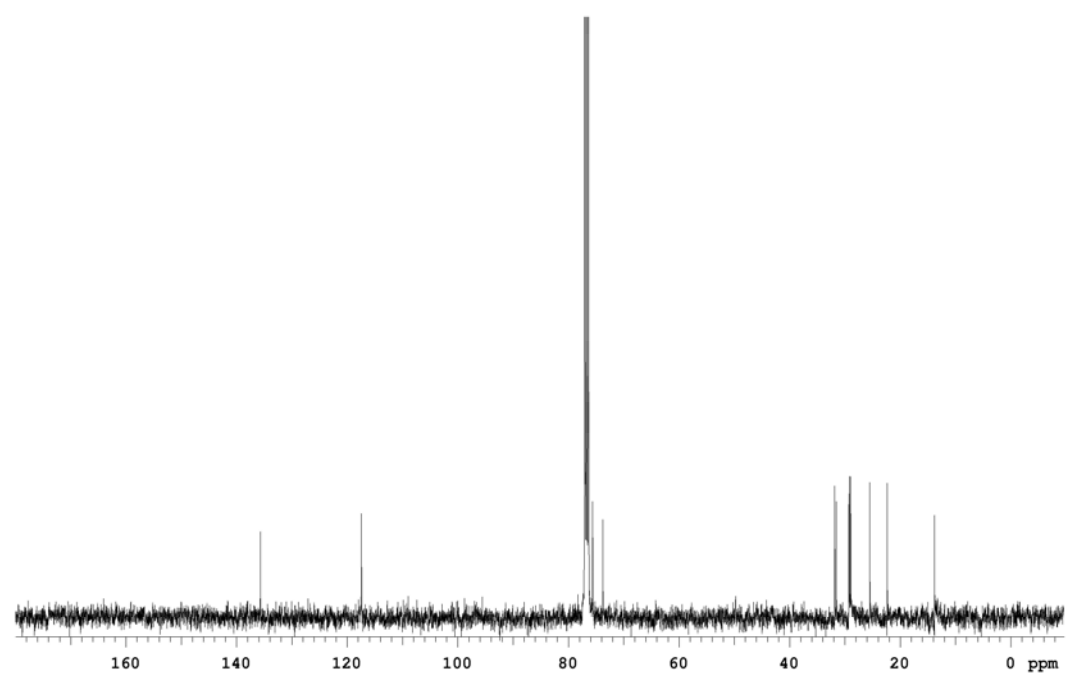

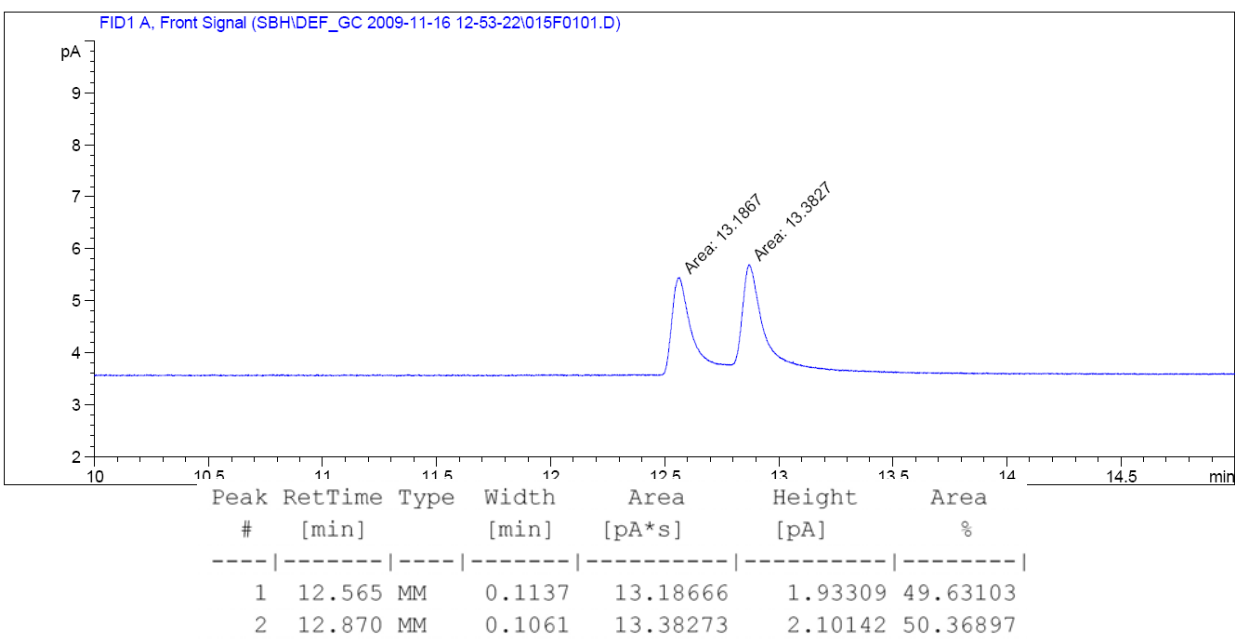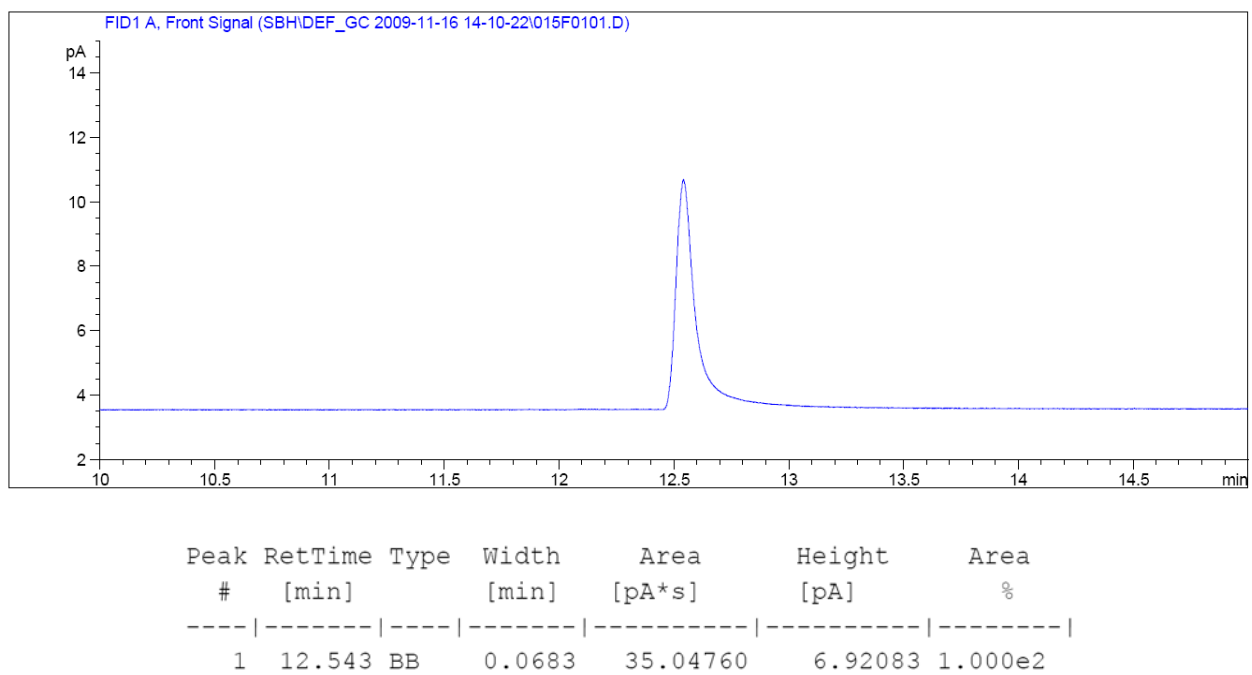

Supplement: Supplementary file 1 [file 4485766]
